# Supplementary material for: Restaurant interventions for salt reduction in China: protocol for a randomised controlled trial
Source: PubMed Central journal article supplement — BMJ Open. 2020 Dec 2;10(12):e038744. doi: 10.1136/bmjopen-2020-038744 (PMC7713225; doi:10.1136/bmjopen-2020-038744), 2020-12-02
Supplement: bmjopen-2020-038744.draft_revisions.pdf [file bmjopen-2020-038744.draft_revisions.pdf]

# BMJ Open

BMJ Open is committed to open peer review. As part of this commitment we make the peer review history of every article we publish publicly available.

When an article is published we post the peer reviewers' comments and the authors' responses online. We also post the versions of the paper that were used during peer review. These are the versions that the peer review comments apply to.

The versions of the paper that follow are the versions that were submitted during the peer review process. They are not the versions of record or the final published versions. They should not be cited or distributed as the published version of this manuscript.

BMJ Open is an open access journal and the full, final, typeset and author-corrected version of record of the manuscript is available on our site with no access controls, subscription charges or pay-per-view fees (<http://bmjopen.bmj.com>).

If you have any questions on BMJ Open's open peer review process please email [info.bmjopen@bmj.com](mailto:info.bmjopen@bmj.com)

# BMJ Open

## The restaurant interventions for salt reduction in China: a randomized controlled trial

|                               |                                                                                                                                                                                                                                                                                                                                                                                                                                                                                                                                                                                                                                                                                                                                                                                                                                                                                                                                                                                                                                                                                                                                                                                                                                                                                                                                                                                                                                                                     |
|-------------------------------|---------------------------------------------------------------------------------------------------------------------------------------------------------------------------------------------------------------------------------------------------------------------------------------------------------------------------------------------------------------------------------------------------------------------------------------------------------------------------------------------------------------------------------------------------------------------------------------------------------------------------------------------------------------------------------------------------------------------------------------------------------------------------------------------------------------------------------------------------------------------------------------------------------------------------------------------------------------------------------------------------------------------------------------------------------------------------------------------------------------------------------------------------------------------------------------------------------------------------------------------------------------------------------------------------------------------------------------------------------------------------------------------------------------------------------------------------------------------|
| Journal:                      | <i>BMJ Open</i>                                                                                                                                                                                                                                                                                                                                                                                                                                                                                                                                                                                                                                                                                                                                                                                                                                                                                                                                                                                                                                                                                                                                                                                                                                                                                                                                                                                                                                                     |
| Manuscript ID                 | bmjopen-2020-038744                                                                                                                                                                                                                                                                                                                                                                                                                                                                                                                                                                                                                                                                                                                                                                                                                                                                                                                                                                                                                                                                                                                                                                                                                                                                                                                                                                                                                                                 |
| Article Type:                 | Protocol                                                                                                                                                                                                                                                                                                                                                                                                                                                                                                                                                                                                                                                                                                                                                                                                                                                                                                                                                                                                                                                                                                                                                                                                                                                                                                                                                                                                                                                            |
| Date Submitted by the Author: | 25-Mar-2020                                                                                                                                                                                                                                                                                                                                                                                                                                                                                                                                                                                                                                                                                                                                                                                                                                                                                                                                                                                                                                                                                                                                                                                                                                                                                                                                                                                                                                                         |
| Complete List of Authors:     | Du, Wenwen; Chinese Center for Disease Control and Prevention National Institute for Nutrition and Health, Zhang, Jiguo; Chinese Center for Disease Control and Prevention National Institute for Nutrition and Health Li, Yuan; The George Institute for Global Health at Peking University Health Science Center He, Feng; Queen Mary University of London, Wolfson Institute of Preventive Medicine Zhou, Xue; Heilongjiang Provincial Center for Disease Control and Prevention Xu, Zhihua; Qinghai Provincial Center for Disease Control and Prevention, Gao, Yifu; Hebei Provincial Center for Disease Control and Prevention Yin, Lei; Hunan Provincial Center for Disease Control and Prevention Chang, Xiaoyu; Sichuan Provincial Center for Disease Control and Prevention Yan, Wei; Jiangxi Provincial Center for Disease Control and Prevention Tan, Monique; Wolfson Institute of Preventive Medicine, Barts and The London School of Medicine & Dentistry, Queen Mary University of London, Centre for Environmental and Preventive Medicine MacGregor, Graham; Queen Mary University of London, Wolfson Institute of Preventive Medicine Luo, Rong; The George Institute for Global Health at Peking University Health Science Center, Zhang, Puhong ; The George Institute for Global Health at Peking University Health Science Center Wang, Huijun; Chinese Center for Disease Control and Prevention National Institute for Nutrition and Health |
| Keywords:                     | EPIDEMIOLOGY, Health policy < HEALTH SERVICES ADMINISTRATION & MANAGEMENT, NUTRITION & DIETETICS, PUBLIC HEALTH                                                                                                                                                                                                                                                                                                                                                                                                                                                                                                                                                                                                                                                                                                                                                                                                                                                                                                                                                                                                                                                                                                                                                                                                                                                                                                                                                     |
|                               |                                                                                                                                                                                                                                                                                                                                                                                                                                                                                                                                                                                                                                                                                                                                                                                                                                                                                                                                                                                                                                                                                                                                                                                                                                                                                                                                                                                                                                                                     |

SCHOLARONE™  
Manuscripts

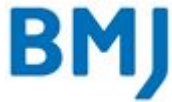

I, the Submitting Author has the right to grant and does grant on behalf of all authors of the Work (as defined in the below author licence), an exclusive licence and/or a non-exclusive licence for contributions from authors who are: i) UK Crown employees; ii) where BMJ has agreed a CC-BY licence shall apply, and/or iii) in accordance with the terms applicable for US Federal Government officers or employees acting as part of their official duties; on a worldwide, perpetual, irrevocable, royalty-free basis to BMJ Publishing Group Ltd ("BMJ") its licensees and where the relevant Journal is co-owned by BMJ to the co-owners of the Journal, to publish the Work in this journal and any other BMJ products and to exploit all rights, as set out in our [licence](#).

The Submitting Author accepts and understands that any supply made under these terms is made by BMJ to the Submitting Author unless you are acting as an employee on behalf of your employer or a postgraduate student of an affiliated institution which is paying any applicable article publishing charge ("APC") for Open Access articles. Where the Submitting Author wishes to make the Work available on an Open Access basis (and intends to pay the relevant APC), the terms of reuse of such Open Access shall be governed by a Creative Commons licence – details of these licences and which [Creative Commons](#) licence will apply to this Work are set out in our licence referred to above.

Other than as permitted in any relevant BMJ Author's Self Archiving Policies, I confirm this Work has not been accepted for publication elsewhere, is not being considered for publication elsewhere and does not duplicate material already published. I confirm all authors consent to publication of this Work and authorise the granting of this licence.

**The restaurant interventions for salt reduction in China: a randomized controlled trial**

Wenwen Du<sup>1</sup>, Jiguo Zhang<sup>1</sup>, Yuan Li<sup>2</sup>, Feng J He<sup>3</sup>, Xue Zhou<sup>4</sup>, Zhihua Xu<sup>5</sup>, Yifu Gao<sup>6</sup>, Lei Yin<sup>7</sup>,  
Xiaoyu Chang<sup>8</sup>, Wei Yan<sup>9</sup>, Monique Tan<sup>3</sup>, Graham A MacGregor<sup>3</sup>, Rong Luo<sup>2</sup>, Puhong Zhang<sup>2</sup>,  
Huijun Wang<sup>1</sup>

<sup>1</sup>The National Institute for Nutrition and Health, Chinese Center for Disease Control and Prevention, Beijing, China

<sup>2</sup>The George Institute for Global Health at Peking University Health Science Center, Beijing, China

**Acknowledgements**

<sup>3</sup>Wolfson Institute of Preventive Medicine, Barts and The London School of Medicine & Dentistry, Queen Mary University of London, London, UK

<sup>4</sup>Heilongjiang Provincial Center for Disease Control and Prevention, Harbin, China

<sup>5</sup>Qinghai Provincial Center for Disease Control and Prevention, Xining, China

<sup>6</sup>Hebei Provincial Center for Disease Control and Prevention, Shijiazhuang, China

<sup>7</sup>Hunan Provincial Center for Disease Control and Prevention, Changsha, China

<sup>8</sup>Sichuan Provincial Center for Disease Control and Prevention, Chengdu, China

<sup>9</sup>Jiangxi Provincial Center for Disease Control and Prevention, Nanchang, China

**Corresponding authors**

Puhong Zhang and Huijun Wang are joint corresponding authors.

Prof Puhong Zhang:

zpuhong@georgeinstitute.org.cn;

Peking University Health Science Center Room 011, Unit 2, Tayuan Diplomatic Office Building

No. 14 Liangmahe Nan Lu, Chaoyang District, Beijing, China; and

Prof Huijun Wang:

wanghj@nih.chinacdc.cn.

29 Nanwei Rd, Xicheng District, Beijing, China.

**Word count:** 3529.

**ABSTRACT**

**Introduction** Salt intake in China is high, and most of it comes from that added by consumers.

1  
2  
3  
4 Nevertheless, recent years have seen a rapid increase in the frequency at which people eat out. The  
5 aim of this study is to evaluate the effectiveness of interventions designed for salt reduction in  
6 restaurants through a randomized controlled trial in China.  
7  
8

9 **Methods and analysis** As a randomized controlled trial with restaurants as study subjects, we  
10 recruited 192 restaurants from 12 counties of 6 provinces in China. After the baseline survey,  
11 restaurants were randomly assigned to intervention or control group. Using social cognitive theory,  
12 comprehensive intervention activities were designed to encourage salt reduction in all restaurant  
13 foods, and at the same time, to encourage consumers to choose lower-salt options when eating out.  
14 The interventions will be conducted only in restaurants of the intervention group during the first  
15 year. The follow-up assessment will be conducted at the end of the trial. The primary outcome is  
16 the change in the average salt content of the 5 best-selling dishes of the restaurant, as measured by  
17 laboratory tests. Secondary outcomes include differences in the monthly use of salt and salty  
18 condiments between intervention and control restaurants, and the knowledge, attitude and practice  
19 (KAP) on salt among restaurant consumers.  
20  
21  
22  
23  
24  
25  
26  
27  
28  
29

30 **Ethics and dissemination** The study has been reviewed and approved by the Review Board of  
31 the National Institute for Nutrition and Health, China CDC, and Queen Mary Research Ethics  
32 Committee. Results will be disseminated through presentations, publications and social media.  
33  
34  
35

36 **Trial registration number** ChiCTR1800019694  
37  
38  
39

#### 40 **Strengths and limitations of this study**

41 The study will develop an effective and sustainable intervention package for salt reduction in  
42 Chinese restaurant settings.  
43  
44

45 Our study covers a wide range of restaurants in China, from 6 provinces and thus representing  
46 different cuisines and eating habits.  
47  
48

49 Due to the commercial nature of restaurants, the implementation of the salt reduction interventions  
50 may be challenging, and need strong multisectoral support and cooperation.  
51  
52  
53

#### 54 **INTRODUCTION**

55 High salt intake is one of the leading dietary risk factors for deaths and disability globally,<sup>1</sup> and was  
56 associated with 3 million deaths and 70 million DALYs in adults around the world. In China, high  
57  
58  
59  
60

1  
2  
3  
4 salt intake attributed to more than 0.5 million cardiometabolic deaths in 2010-12.<sup>2</sup> The most  
5  
6 common risk of high salt intake is raised blood pressure, which alone accounts for an estimated 10.7  
7  
8 million deaths each year worldwide.<sup>3</sup> Statistics from the 2015 China's Report on Nutrition and  
9  
10 Chronic Diseases revealed that the prevalence of hypertension among the Chinese population aged  
11  
12 18 years and older was 25.2% in 2012,<sup>4</sup> with the total number of individuals with high blood  
13  
14 pressure reaching 270 million. International experience has proved that reducing population salt  
15  
16 intake lowered blood pressure and reduced the risk of cardiovascular disease (CVD).<sup>5 6</sup> Salt  
17  
18 reduction is considered one of the most cost-effective measures to improve public health.<sup>7</sup> In China,  
19  
20 people consume significantly more salt than the WHO-recommended level of maximum 5g per day  
21  
22 for adults.<sup>8 9</sup>

23  
24 With the rapid urbanization and lifestyle changes in China, eating in restaurants has been becoming  
25  
26 popular, especially in urban areas. National survey (2010-12) statistics have shown that, 35.5% of  
27  
28 the Chinese aged 6 years and older have eaten out in the past week. The proportion of people dining  
29  
30 out was 42.2% and 28.5% in urban and rural areas respectively.<sup>4</sup> Restaurants are becoming the  
31  
32 second major dining location in China, and this has important impacts on public health and nutrition.  
33  
34 A pilot study using a one-week salt estimation method in Beijing found that approximately 40% of  
35  
36 the salt intake was consumed outside the home.<sup>10</sup> Restaurant dishes seem to have a high sodium  
37  
38 content in both developed and developing countries.<sup>11-14</sup> A study showed that 46.8% of the dishes  
39  
40 served in Chinese restaurants in Beijing contained more salt than the daily salt intake recommended  
41  
42 by WHO.<sup>14</sup> Sodium content was substantially higher in restaurant foods than in home-made foods.  
43  
44 <sup>15-17</sup> Therefore, to help consumers reduce their overall salt intake, it is important to develop an  
45  
46 effective strategy to reduce the sodium content of restaurant foods.

47  
48 To tackle the high salt intake levels in China, Action on Salt China (ASC) was set up in 2017, funded  
49  
50 by the UK National Institute for Health Research (NIHR). ASC aims to implement comprehensive  
51  
52 national salt reduction programs, with the leadership of Queen Mary University of London  
53  
54 (QMUL), the George Institute China (TGI), Chinese Center for Disease Control and Prevention  
55  
56 (China CDC) and other key related organizations.<sup>18</sup> The ASC team developed two national health  
57  
58 campaigns (health education and salt reduction in packaged food) and four randomized controlled  
59  
60 trials (RCTs) to test interventions targeting the major sources of salt intake<sup>19</sup>. The RCTs consisted  
of (1) an application-based intervention study in schoolchildren and their families (AIS);<sup>20</sup> (2) a

1  
2  
3  
4 home cook-based intervention study (HIS); (3) a comprehensive intervention study (CIS);<sup>21</sup> and (4)  
5 a restaurant-based intervention study (RIS), which is the one reported in the present paper.

6  
7 RIS was designed to test the effectiveness and feasibility of a restaurant salt reduction package in 6  
8 provinces of China. The key interventions were based on social cognitive theory<sup>22</sup> and included:  
9  
10 (1) building tailored restaurant environments that encourage consumers to order lower-salt or  
11 reduced-salt dishes; (2) lower-salt or reduced-salt ordering reminders from the waiters; (3) training  
12 cooks in reduced-salt cooking; (4) salt reduction campaigns. As a part of the ASC program, this  
13 article reports on the design of the RIS intervention package and its implementation, evaluation, and  
14 current status.  
15  
16  
17  
18  
19  
20  
21  
22

## 23 **METHODS AND ANALYSIS**

### 24 **Study setting and sampling method**

25  
26 To account for geographical, economic and dietary disparities, our study will be carried out in 6  
27 provinces of China: Heilongjiang, Hebei, Qinghai, Hunan, Sichuan and Jiangxi. As a RCT study,  
28 the RIS baseline survey was conducted in May 2019, and an evaluation survey will be conducted a  
29 year later, at the end of the trial. One hundred ninety-two restaurants were selected from 12 counties  
30 of the above-mentioned 6 provinces. In each province, two counties of similar socioeconomic level  
31 in the provincial capital city were selected. The counties that had participated in other salt-reduction  
32 projects were excluded to minimize contamination. To determine the effectiveness of the salt  
33 reduction package in restaurants of different sizes, of the 16 Chinese restaurants randomly selected  
34 from each county, it was ensured these included 4 large restaurants, 8 medium restaurants and 4  
35 small restaurants. The restaurants were then randomly allocated to the intervention or control group  
36 after the baseline survey, using the random procedure on electronic data recording platform (EDC).  
37 The comprehensive intervention package is designed to both inspire the salt-reduction requirement  
38 in consumers and promote the skills of reduced-salt cooking and ordering service in restaurant staff.  
39  
40  
41  
42  
43  
44  
45  
46  
47  
48  
49  
50  
51

### 52 **Restaurant inclusion criteria and recruitment**

53  
54 Firstly, we released an open letter via local Media and cooperated with the Market Regulation  
55 Bureau to recruit restaurants which are interested in participating in the program. Then the standard  
56 inclusion criteria were used to screen for potential restaurants, including: (1) restaurants mainly  
57 offering Chinese cuisine; (2) agreeing to participate in one year of comprehensive salt reduction  
58  
59  
60

intervention and in at least two assessment surveys; (3) with complete records of salt and other condiments purchase and usage; (4) had been operating normally for more than 1 year and without plan of relocating or closing in the next 2 years; (5) with >50% of the dishes that could be prepared with less salt. Restaurants that were already involved in other salt reduction programs will be excluded. Restaurant size was determined based on surface area or number of seats (table 1). The EDC platform conducted the random selection procedure using the above information of restaurants.

Table 1 Restaurant size classification

| Classification    | Square meters (m <sup>2</sup> ) | (or) Number of seats |
|-------------------|---------------------------------|----------------------|
| Large restaurant  | >500 and ≤3000                  | >250 and ≤1000       |
| Medium restaurant | >150 and ≤500                   | >75 and ≤250         |
| Small restaurant  | ≤150                            | ≤75                  |

### Randomization

After baseline assessment, restaurants were randomly allocated to either the control group or the intervention group (96 restaurants in each group). The randomization was stratified by the size of restaurants and carried out using computer generated random numbers by a statistician who is not involved in the study and is blind to the identity of the restaurants. For the year following the baseline survey, the intervention restaurants will implement a series of intervention activities aiming to reduce salt. Meanwhile, the control restaurants will operate as usual.

### Intervention

The objective of RIS is to reduce salt use in restaurants. We aim to achieve not only short-term, but also sustainable long-term effects. Social cognitive theory proposes behavior is influenced by the constant interaction of personal factors (ie. Skills, knowledge) and environmental factors (ie. appropriate modeling for learning, available materials)<sup>22</sup>. Therefore, we designed the intervention activities based on both the supply (restaurant) and demand (consumer) sides (Figure 1). For the intervention group, the RIS intervention package included the following activities:

Figure 1 The RIS intervention design

(1) Menu labelling:



1  
2  
3  
4 In the baseline survey, we collected the detailed ingredients composition, including the amount of  
5 salt and condiments, of the 50 best-selling dishes of each restaurant. If a restaurant offers fewer than  
6 50 dishes, information on all available dishes were collected. In each restaurant, the 10% of the  
7 dishes that had the lowest sodium content (according to baseline survey) were labelled “lower salt”  
8 on the menu, thus providing clear information to the customers. This menu will be used in the  
9 intervention restaurants throughout the trial period (one year).  
10  
11  
12  
13  
14

15 (2) Training for chef and waiter/waitress:

16  
17 In close collaboration with culinary experts, we developed a series of training materials, including  
18 manual and videos, to guide chefs and waiters/waitresses in encouraging salt reduction services in  
19 their routine work. Besides, we organized the service of a professional team to offer face-to-face  
20 training for the restaurant staff of each county at least once a year. At least 3 representatives per  
21 restaurant were required to attend the training. This training mainly focused on the following  
22 aspects: “salt sources in restaurant dishes”, “why reduce salt”, “practical skills in reducing salt for  
23 restaurant cooking”, “building a reduced-salt environment in a restaurant” and “service and  
24 communication skills”. Local county investigators are responsible to enhance the knowledge and  
25 skills among staff in each intervention restaurant by conducting monthly follow-up supervisions.  
26  
27  
28  
29  
30  
31  
32  
33

34 During the trial, each intervention restaurant is encouraged to reduce salt usage by 10% in all dishes,  
35 and greater reductions according to the customers’ request (such as, -30% or -50% salt).  
36 Furthermore, at least 3 lower-salt dishes (sodium  $\leq$  100mg/100g) per restaurant should be developed  
37 through reformulation to provide customers more lower-salt options. Waiters/waitresses are  
38 required to recommend customers the lower-salt dishes, as well as remind them they can choose the  
39 reduced-salt option with almost all the other dishes.  
40  
41  
42  
43  
44  
45  
46

47 (3) Supportive environment for salt reduction in restaurants:

48 Information that refers to salt reduction, salt and health, and available reduced-salt dishes will be  
49 shown through videos, posters, brochures, leaflets, and table displays to build restaurant  
50 environments that are making it easier for the customers to choose lower-salt options. For example,  
51 messages with announcement “-30%/-50% salt options are available for most dishes” will be posted  
52 on dining tables. These materials will be displayed at noticeable positions in the intervention  
53 restaurants during the trial period.  
54  
55  
56  
57  
58  
59  
60

(4) Salt reduction campaign:

To create a social environment supportive of salt reduction, local investigators will organize a campaign at least once during the 1-year trial, with the theme of “less salt, healthy eating”, to help raise consumers’ awareness of salt reduction when they eat out. Another important aim is to encourage restaurants to pay more attention to reducing salt and offering lower-salt dishes. To expand the reach of the campaign, news agencies and social media will be encouraged to disseminate the campaign messages. To limit contamination to control group, the salt reduction campaign should only involve the restaurants in intervention group.

A certified medal of “ASC Salt Reducing Restaurant” will be granted to intervention restaurants, according to the standardized requirements. The medal will help motivate restaurants for salt reduction and value their efforts.

### **Sample size**

In the current randomized controlled trial, selected restaurants are the study subjects. Based on the results of a study on Chinese restaurants,<sup>23</sup> we assume a standard deviation (SD) of 1g/100g of dish for the sodium content of Chinese restaurant dishes, and expect that a sample of 192 restaurants will achieve 80% power (with two-sided alpha=0.05) to detect a change of 0.5 g/100g dish for the 5 best-selling dishes in each restaurant, allowing for a 20% dropping rate of restaurants. Therefore, a total of 192 restaurants were recruited into the study.

### **Outcome measures**

The primary outcome is the change in the sodium content of the 5 best-selling dishes from baseline to the end of the trial (Figure 2).

Secondary outcomes include the differences between the intervention and control groups in: (1) monthly use of salt and main salty condiments by the restaurant chefs; (2) salt-related knowledge, attitude and practice (KAP) in restaurant customers.

Figure 2 RIS trial design

### **Outcome assessments**

The primary and secondary outcomes will be assessed before and after the 1-year intervention, in

1  
2  
3  
4 both intervention and control restaurants.

5  
6 For the primary outcome, we will collect the whole portion of the 5 best-selling dishes of each  
7  
8 restaurant at baseline and follow-up assessment, to test their sodium content using laboratory flame  
9  
10 atomic absorption spectrometry method. Although it would be possible to estimate the sodium  
11  
12 content of a dish by asking the chefs what ingredients and condiments they have used, this would  
13  
14 rely on the chefs' memory. By using laboratory tests, we ensure the accurate assessment of the  
15  
16 sodium content of the dishes. The dishes chosen for laboratory test should be top-selling firstly, and  
17  
18 then involve different types according to the ingredients (ie. animal food based dishes, mixed food  
19  
20 dishes, and vegetable food based dishes). The local researchers will go to each restaurant and buy  
21  
22 the 5 best-selling dishes anonymously in order to avoid introducing bias. The whole dishes,  
23  
24 including sauce and soup when appropriate, will be weighed and photographed. Once cooled off,  
25  
26 they will be transferred to a sampling bag. The samples are stored at -20°C in refrigerator until  
27  
28 transferred to the laboratory. Theoretically, for each restaurant, the same dishes bought at a similar  
29  
30 date of the year should be assessed at baseline and follow-up assessment. However, if the dishes  
31  
32 collected at baseline are no longer sold at the follow-up assessment, comparable dishes with similar  
33  
34 ingredients and cooking method could be chosen as alternatives.

35  
36 For the secondary outcomes, questionnaires will be administered by trained local investigators  
37  
38 through a mobile EDC app developed for RIS. Compared to traditional data collection methods, the  
39  
40 mobile EDC has advantages in terms of process and quality control, as demonstrated in clinical trial  
41  
42 study <sup>24</sup>. There are two questionnaires in the survey, including restaurant assessment and consumer  
43  
44 survey. The questions related to the restaurant assessment consist of: (1) basic information about  
45  
46 the restaurant; (2) salt reduction environment and services in restaurant; (3) monthly salt and salty  
47  
48 condiments usage; (4) attitude and challenges related to reducing salt in restaurant; (5) dishes ( $\leq 50$   
49  
50 dishes/restaurant) recipe (all ingredients and condiments used, and in what quantity) and cooking  
51  
52 method. The restaurant-related questions will be asked to the owners/managers who directly manage  
53  
54 the restaurant, and the recipes will be collected by face-to-face interview with chefs who are familiar  
55  
56 with preparing those dishes. To assist chefs in remembering accurately the amount of ingredients  
57  
58 used in the dishes, the investigators will show them the weighed amount using a usual spoon or  
59  
60 other measuring instruments used in their restaurants.

1  
2  
3  
4 For the consumer survey, we will randomly select 20 customers (10 males and 10 females) in all  
5 intervention and control restaurants, before and after the trial, to assess the changes and differences  
6 of knowledge, attitudes, and behaviours related to salt reduction.  
7  
8

### 9 **Data collection, management and analysis**

#### 10 **Data collection**

11  
12 We use the specially designed mobile EDC to collect assessments data during the RIS program, as  
13 well as monthly supervision records in the 1-year comprehensive intervention. The local CDCs are  
14 responsible for data collection. The structure of data collection system consists of 192 restaurants.  
15  
16 The local researchers log in the system, input the assessment data and supervision records in each  
17 restaurant page. The assessment data includes: (1) information on restaurants' salt reduction-related  
18 environment, service, attitude, challenges, and monthly salt usage, as well as some sales data; (2)  
19 information on recipe, cooking method, and laboratory sodium content; (3) information on customer  
20 knowledge, attitude, and behaviors related to salt reduction. Supervision records include  
21 information on the process of intervention activities, and any reason for not carrying them out, as  
22 well as photos that could inform on the intervention status.  
23  
24  
25  
26  
27  
28  
29  
30  
31  
32

#### 33 **Data management**

34  
35 The mobile EDC used in the RIS program was developed by the Beijing University of Aeronautics  
36 and Astronautics. The security of data management was demonstrated in another publication under  
37 the same ASC project <sup>20</sup>. To guarantee the integrity and authenticity of data collection, local  
38 researchers were given different level of authority according to their roles. For example, the local  
39 investigators are responsible for inputting survey and supervision data, but could not delete the  
40 records they added. The inspectors have authority to check the data accuracy, delete mistaken  
41 records, start and close discussion about doubtful data, but cannot add new records. The person in  
42 charge at county, provincial and national levels, can view the data of all restaurants under their  
43 management, but could not make any changes. All modifications will be stored in the EDC system.  
44  
45  
46  
47  
48  
49  
50  
51

#### 52 **Statistical analysis**

53  
54 The effect of the intervention package for restaurants on the outcomes will be determined using  
55 linear mixed models, including group (intervention, group), time (baseline, follow-up), and  
56 interaction of group\*time, with adjustments for potential confounding variables. We will consider  
57 sensitivity analyses to examine the robustness of the conclusion of the primary analysis. Results  
58  
59  
60

1  
2  
3  
4 will be described as mean, SD, standard error (SE), and 95% confidence interval when appropriate.  
5  
6 SAS 9.4 will be used for the data cleaning and statistical analyses. All analyses will be two sided,  
7  
8 and  $P < 0.05$  will be considered significant.

### 9 10 **Economic and process evaluation**

11  
12 Economic evaluation will be conducted from the health sector perspective to compare the  
13  
14 comprehensive intervention package for restaurant on salt reduction versus business as usual, and it  
15  
16 will include two dimensions: a trial-based economic evaluation, and a modelled economic  
17  
18 evaluation of long-term costs and outcomes. Intervention costs will include the direct costs of  
19  
20 running the program, excluding any research and development costs. We will consider restaurant  
21  
22 dishes consumption at the population level to examine the economic evaluation. Therefore, the trial-  
23  
24 based economic evaluation will be assessed in terms of incremental cost per unit salt reduction in  
25  
26 restaurant dishes and systolic blood pressure (BP). The conversion of sodium in restaurant dishes to  
27  
28 daily sodium intake for the population, and its relationship with systolic BP, will be based on the  
29  
30 scientific literature and other population trials under the ASC project. The modelled economic  
31  
32 evaluation will examine the cost, survival, health states (including death and CVD events) to  
33  
34 estimate incremental cost per life year saved and cost per quality-adjusted life year gained. The  
35  
36 transition probabilities across health states and costs attached to different health states, and the long-  
37  
38 term effects of reduction in sodium intake will be based on literature data. Sensitivity analyses will  
39  
40 be used to estimate uncertainty about the primary findings associated with various key parameters.  
41  
42 The process evaluation will help us assess the fidelity and adoption of key components of  
43  
44 intervention (frequency, coverage and satisfaction), and understand the barriers and facilitators of  
45  
46 the intervention. The evaluation will be conducted using mixed-methods during and at the end of  
47  
48 the trial, from monthly supervision records, structured process evaluation form, and in-depth  
49  
50 interviews with restaurant staff and customers. Designed forms, including sales form of lower-salt  
51  
52 labeling dishes, recipe information form of reduced-salt dishes, and consumer feedback cards will  
53  
54 be collected at three time points during the intervention period, in order to monitor the acceptance  
55  
56 and the effect of the RIS intervention.

### 56 57 **Project status and timelines**

58  
59 The recruitment of restaurants started in April 2019. Baseline assessments were conducted between  
60  
May and June 2019. One hundred ninety-two restaurants from 12 counties completed the baseline

1  
2  
3 survey, with data from 976 laboratory-tested dishes, 8145 recipes, and 3840 customers.  
4  
5 Theoretically, the follow-up assessment will be conducted in the middle 2020, after 12 months  
6  
7 intervention. Due to nation-wide epidemic of novel coronavirus disease (COVID-19) in China,  
8  
9 restaurants have been closed for several months, since late January 2020. We will evaluate the  
10  
11 influence of the epidemic on restaurants, especially for the intervention group, and decide on  
12  
13 whether to postpone the follow-up assessment and other issues.  
14

### 15 **Expected outcome and potential impact**

16  
17 Unlike the standardized menus found in western fast food chains, Chinese dishes vary considerably  
18  
19 by areas, restaurants, and chefs, even for dishes with the same name. Few studies exist on the sodium  
20  
21 content of restaurant dishes in China.<sup>14 25</sup> The current study covers a wide range of restaurants in 6  
22  
23 provinces, could provide the evidence on the sodium level and sources in Chinese restaurants, which  
24  
25 is helpful to develop the specific intervention measures. The study will explore a feasible, effective  
26  
27 and sustainable approach to achieve salt reduction for Chinese restaurants. With an increasing  
28  
29 proportion of people eating out, restaurant dishes contribute much more sodium than decades before  
30  
31 and induce more health risks. Compared with salt reduction initiatives in individuals, communities  
32  
33 or schools, those conducted in restaurants face more challenges. With this study, we will identify  
34  
35 barriers and motivations for implementation, as well as solutions suitable to Chinese restaurants to  
36  
37 reduce salt, and based on these findings, we will be able to draw important public health  
38  
39 implications.  
40

### 41 **Patient and public involvement**

42  
43 Using information on the current situation of Chinese restaurants, inclusion criteria were determined  
44  
45 before the recruitment. An open letter was disseminated via local media, introducing the RIS project  
46  
47 and calling for participation publicly. Local CDC investigators, with support from the  
48  
49 Administration for Market Regulation, make various mobilization efforts to help restaurant owners  
50  
51 understand the purpose of the project and the information to be collected in the investigation. With  
52  
53 the consent of selected restaurants, we will conduct assessment surveys and implement the  
54  
55 intervention. At the end of the study, we will disseminate the results to the restaurants, and discuss  
56  
57 with related stakeholders how to translate the research findings into practice and develop a public  
58  
59 health strategy.  
60

### **ETHICS AND DISSEMINATION**

1  
2  
3  
4 According to the results of ethics review by the Review Board of the National Institute for Nutrition  
5 and Health, China CDC, and Queen Mary Research Ethics Committee, written informed consent  
6 from restaurants is exempted from the RIS project. However, the investigators should fully inform  
7 the selected restaurants of the purpose and activities of the project, strive for understanding and  
8 cooperation, and keep the information confidential. The restaurants will be free to discontinue their  
9 participation at any time without reasons.

10  
11  
12  
13  
14  
15 The findings of this research will be disseminated through conference presentations, peer-reviewed  
16 publications, press release and social media.

#### 17 18 19 **Author affiliations**

20  
21 <sup>1</sup>The National Institute for Nutrition and Health, Chinese Center for Disease Control and Prevention,  
22 Beijing, China

23  
24  
25 <sup>2</sup>The George Institute for Global Health at Peking University Health Science Center, Beijing, China

#### 26 27 **Acknowledgements**

28  
29 <sup>3</sup>Wolfson Institute of Preventive Medicine, Barts and The London School of Medicine & Dentistry,  
30 Queen Mary University of London, London, UK

31  
32  
33 <sup>4</sup>Heilongjiang Provincial Center for Disease Control and Prevention, Harbin, China

34  
35 <sup>5</sup>Qinghai Provincial Center for Disease Control and Prevention, Xining, China

36  
37 <sup>6</sup>Hebei Provincial Center for Disease Control and Prevention, Shijiazhuang, China

38  
39 <sup>7</sup>Hunan Provincial Center for Disease Control and Prevention, Changsha, China

40  
41 <sup>8</sup>Sichuan Provincial Center for Disease Control and Prevention, Chengdu, China

42  
43 <sup>9</sup>Jiangxi Provincial Center for Disease Control and Prevention, Nanchang, China

44  
45 **Acknowledgements** The authors would like to thank the restaurant managers, chefs and servicers,  
46 consumers, local administration for market regulation, experts of Sichuan Tourism University for  
47 their opinions on the development of the intervention program.

48  
49  
50 **Contributors** PZ and FJH conceived the project. WD, JZ, HW, YL, FJH and PZ participated in  
51 study design and implementation. WD, JZ, HW, YL, PZ, FJH, XZ, HX, YG, LY, XC and WY  
52 facilitates restaurant and public involvement and were responsible for setting up the study in each  
53 site. All authors contributed to the development of intervention and evaluation. WD wrote the first  
54 draft of the manuscript, and JZ, HW, YL, PZ, FJH, MT, GAM and RL revised the draft. All authors  
55 contributed to the refinement of the study protocol and approved the final manuscript.

1  
2  
3  
4 **Funding** This work is supported by the National Institute of Health Research (NIHR, NIHR Global  
5 Health Research Unit Action on Salt China at Queen Mary University of London) using Official  
6 Development Assistance (ODA) funding (16/136/77). The views expressed in this publication are  
7 those of the author(s) and not necessarily those of the NIHR or the Department of Health and Social  
8 Care.  
9  
10  
11  
12

13 **Disclaimer** The findings of this study will be disseminated through discussions or presentations at  
14 conferences, peer-reviewed publications and general media.  
15  
16

17 **Competing interests** FJH is a member of the Consensus Action on Salt & Health (CASH) group,  
18 a non-profit charitable organization, and its international branch World Action on Salt & Health  
19 (WASH) does not receive any financial support from CASH or WASH. GAM is the chairman of  
20 Blood Pressure UK (BPUK), chairman of CASH and chairman of WASH and does not receive any  
21 financial support from any of these organizations. BPUK, CASH and WASH are non-profit  
22 charitable organizations. All other authors have no competing interests to declare.  
23  
24  
25  
26  
27  
28

29 **Patient consent for publication** Not required.  
30

31 **Ethics approval** The study has been reviewed and approved by the Review Board of the National  
32 Institute for Nutrition and Health, China CDC (20180314), and Queen Mary Research Ethics  
33 Committee (QMERC2018/14).  
34  
35  
36

37 **Provenance and peer review** Not mentioned; externally peer reviewed.  
38

39 **Open access** This is an open access article distributed in accordance with the Creative Commons  
40 Attribution Non Commercial (CC BY-NC 4.0) license, which permits others to distribute, remix,  
41 adapt, build upon this work non-commercially, and license their derivative works on different terms,  
42 provided the original work is properly cited, appropriate credit is given, any changes made indicated  
43 and the use is non-commercial. See: <http://creativecommons.org/licenses/by-nc/4.0/>.  
44  
45  
46  
47  
48  
49

## 50 REFERENCES

- 51 1. Collaborators GBDD. Health effects of dietary risks in 195 countries, 1990-2017: a systematic  
52 analysis for the Global Burden of Disease Study 2017. *Lancet* 2019;393(10184):1958-72.  
53
- 54 2. He Y, Li Y, Yang X, et al. The dietary transition and its association with cardiometabolic  
55 mortality among Chinese adults, 1982-2012: a cross-sectional population-based study. *Lancet*  
56 *Diabetes Endocrinol* 2019;7(7):540-48.  
57  
58  
59  
60



- 1  
2  
3  
4 3. Forouzanfar MH, Liu P, Roth GA, et al. Global Burden of Hypertension and Systolic Blood  
5 Pressure of at Least 110 to 115 mm Hg, 1990-2015. *JAMA* 2017;317(2):165-82.
- 6  
7  
8 4. Bureau of National Health and Family Planning Commission Disease Prevention and Control.  
9 Report on Chinese Residents' Chronic Diseases and Nutrition. Beijing: *People's Medical*  
10 *Publishing House*, 2015.
- 11  
12  
13 5. Aburto NJ, Ziolkovska A, Hooper L, et al. Effect of lower sodium intake on health: systematic  
14 review and meta-analyses. *BMJ* 2013;346:f1326.
- 15  
16  
17 6. He FJ, Li J, Macgregor GA. Effect of longer term modest salt reduction on blood pressure:  
18 Cochrane systematic review and meta-analysis of randomised trials. *BMJ* 2013;346:f1325.
- 19  
20  
21 7. Asaria P, Chisholm D, Mathers C, et al. Chronic disease prevention: health effects and financial  
22 costs of strategies to reduce salt intake and control tobacco use. *Lancet* 2007;370(9604):2044-53.
- 23  
24  
25 8. Anderson CA, Appel LJ, Okuda N, et al. Dietary sources of sodium in China, Japan, the United  
26 Kingdom, and the United States, women and men aged 40 to 59 years: the INTERMAP study. *J*  
27 *Am Diet Assoc* 2010;110(5):736-45.
- 28  
29  
30 9. He FJ, Wu Y, Feng XX, et al. School based education programme to reduce salt intake in children  
31 and their families (School-EduSalt): cluster randomised controlled trial. *BMJ* 2015;350:h770.
- 32  
33  
34 10. Zhao F, Zhang P, Zhang L, et al. Consumption and sources of dietary salt in family members in  
35 Beijing. *Nutrients* 2015;7(4):2719-30.
- 36  
37  
38 11. Ahuja JK, Wasswa-Kintu S, Haytowitz DB, et al. Sodium content of popular commercially  
39 processed and restaurant foods in the United States. *Prev Med Rep* 2015;2:962-7.
- 40  
41  
42 12. Wolfson JA, Moran AJ, Jarlenski MP, et al. Trends in Sodium Content of Menu Items in Large  
43 Chain Restaurants in the U.S. *Am J Prev Med* 2018;54(1):28-36.
- 44  
45  
46 13. Prentice CA, Smith C, McLean RM. Sodium in commonly consumed fast foods in New Zealand:  
47 a public health opportunity. *Public Health Nutr* 2016;19(6):958-66.
- 48  
49  
50 14. Li XQ, Wang Z, Men JH, et al. Sodium content and energy of 47 commercial dishes in four  
51 restaurants in Beijing. *Zhonghua Yu Fang Yi Xue Za Zhi* 2013;47(1):27-30.
- 52  
53  
54 15. An R. Fast-food and full-service restaurant consumption and daily energy and nutrient intakes  
55 in US adults. *Eur J Clin Nutr* 2016;70(1):97-103.
- 56  
57  
58 16. Zang J, Luo B, Wang Y, et al. Eating Out-of-Home in Adult Residents in Shanghai and the  
59 Nutritional Differences among Dining Places. *Nutrients* 2018;10(7).
- 60

- 1  
2  
3  
4 17. Jia X, Liu J, Chen B, et al. Differences in nutrient and energy contents of commonly consumed  
5 dishes prepared in restaurants v. at home in Hunan Province, China. *Public Health Nutr*  
6 2018;21(7):1307-18.  
7  
8  
9 18. He FJ, Zhang P, Li Y, et al. Action on Salt China. *Lancet* 2018;392(10141):7-9.  
10  
11 19. Zhang P, He FJ, Li Y, Li C, Wu J, Ma J, Zhang B, Wang H, Li Y, Han J, Luo R, He J, Li X, Liu  
12 Y, Wang C, Tan M, MacGregor GA, Li X. Action on Salt China (ASC): rationale and design  
13 (preprint). *JMIR Research Protocols* 2019.  
14  
15  
16 20. He FJ, Zhang P, Luo R, et al. An Application-based programme to reinforce and maintain lower  
17 salt intake (AppSalt) in schoolchildren and their families in China. *BMJ Open*  
18 2019;9(7):e027793.  
19  
20  
21 21. Xu J, Tang B, Liu M, et al. A town level comprehensive intervention study to reduce salt intake  
22 in China: protocol for a cluster randomised controlled trial. *BMJ Open* 2020;10(1):e032976.  
23  
24  
25 22. Ahn SH, Kwon JS, Kim K, et al. Stages of Behavioral Change for Reducing Sodium Intake in  
26 Korean Consumers: Comparison of Characteristics Based on Social Cognitive Theory. *Nutrients*  
27 2017;9(8).  
28  
29  
30 23. Ma GX, Shive S, Zhang Y, et al. Knowledge, perceptions, and behaviors related to salt use  
31 among Philadelphia Chinese take-out restaurant owners and chefs. *Health Promot Pract*  
32 2014;15(5):638-45.  
33  
34  
35 24. Zhang J, Sun L, Liu Y, et al. Mobile Device-Based Electronic Data Capture System Used in a  
36 Clinical Randomized Controlled Trial: Advantages and Challenges. *J Med Internet Res*  
37 2017;19(3):e66.  
38  
39  
40 25. Zhao N, Liang B, He P, et al. A survey on the sodium content of customers' orderings at three  
41 restaurants in Beijing. *Zhonghua Liu Xing Bing Xue Za Zhi* 2014;35(4):393-6.  
42  
43  
44  
45  
46  
47  
48  
49  
50

51 Figure 1 The RIS intervention design

52  
53  
54 Figure 2 RIS trial design  
55  
56  
57  
58  
59  
60

1  
2  
3  
4  
5  
6  
7  
8  
9  
10  
11  
12  
13  
14  
15  
16  
17  
18  
19  
20  
21  
22  
23  
24  
25  
26  
27  
28  
29  
30  
31  
32  
33  
34  
35  
36  
37  
38  
39  
40  
41  
42  
43  
44  
45  
46  
47  
48  
49  
50  
51  
52  
53  
54  
55  
56  
57  
58  
59  
60

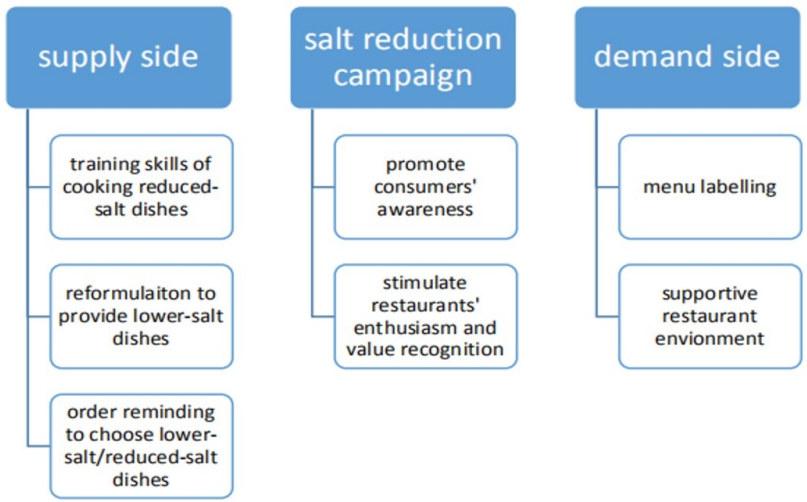

Figure 1 The RIS intervention design

338x190mm (96 x 96 DPI)

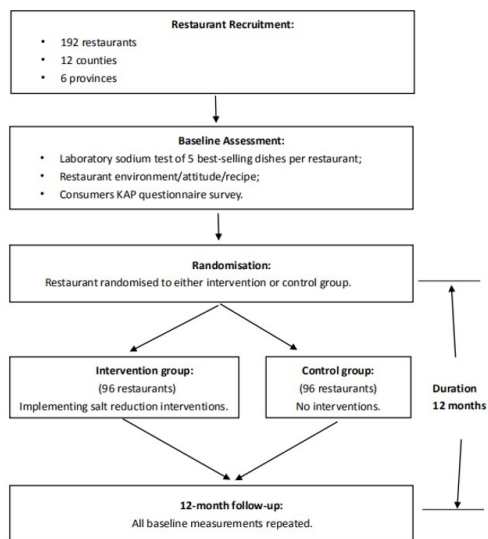

Figure 2 RIS trial design

338x190mm (96 x 96 DPI)

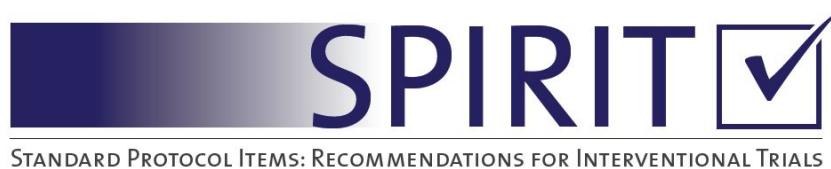

SPIRIT 2013 Checklist: Recommended items to address in a clinical trial protocol and related documents\*

| Section/item                      | Item No | Description                                                                                                                                                                                                                                                                                                                  |
|-----------------------------------|---------|------------------------------------------------------------------------------------------------------------------------------------------------------------------------------------------------------------------------------------------------------------------------------------------------------------------------------|
| <b>Administrative information</b> |         |                                                                                                                                                                                                                                                                                                                              |
| Title                             | 1       | Descriptive title identifying the study design, population, interventions, and, if applicable, trial acronym <input checked="" type="checkbox"/>                                                                                                                                                                             |
| Trial registration                | 2a      | Trial identifier and registry name. If not yet registered, name of intended registry <input checked="" type="checkbox"/>                                                                                                                                                                                                     |
|                                   | 2b      | All items from the World Health Organization Trial Registration Data Set <input checked="" type="checkbox"/>                                                                                                                                                                                                                 |
| Protocol version                  | 3       | Date and version identifier <input checked="" type="checkbox"/>                                                                                                                                                                                                                                                              |
| Funding                           | 4       | Sources and types of financial, material, and other support <input checked="" type="checkbox"/>                                                                                                                                                                                                                              |
| Roles and responsibilities        | 5a      | Names, affiliations, and roles of protocol contributors <input checked="" type="checkbox"/>                                                                                                                                                                                                                                  |
|                                   | 5b      | Name and contact information for the trial sponsor <input checked="" type="checkbox"/>                                                                                                                                                                                                                                       |
|                                   | 5c      | Role of study sponsor and funders, if any, in study design; collection, management, analysis, and interpretation of data; writing of the report; and the decision to submit the report for publication, including whether they will have ultimate authority over any of these activities <input checked="" type="checkbox"/> |
|                                   | 5d      | Composition, roles, and responsibilities of the coordinating centre, steering committee, endpoint adjudication committee, data management team, and other individuals or groups overseeing the trial, if applicable (see Item 21a for data monitoring committee) <input checked="" type="checkbox"/>                         |
| <b>Introduction</b>               |         |                                                                                                                                                                                                                                                                                                                              |
| Background and rationale          | 6a      | Description of research question and justification for undertaking the trial, including summary of relevant studies (published and unpublished) examining benefits and harms for each intervention <input checked="" type="checkbox"/>                                                                                       |
|                                   | 6b      | Explanation for choice of comparators <input checked="" type="checkbox"/>                                                                                                                                                                                                                                                    |
| Objectives                        | 7       | Specific objectives or hypotheses <input checked="" type="checkbox"/>                                                                                                                                                                                                                                                        |
| Trial design                      | 8       | Description of trial design including type of trial (eg, parallel group, crossover, factorial, single group), allocation ratio, and framework (eg, superiority, equivalence, noninferiority, exploratory) <input checked="" type="checkbox"/>                                                                                |

## Methods: Participants, interventions, and outcomes

|                      |     |                                                                                                                                                                                                                                                                                                                                                                                                                    |
|----------------------|-----|--------------------------------------------------------------------------------------------------------------------------------------------------------------------------------------------------------------------------------------------------------------------------------------------------------------------------------------------------------------------------------------------------------------------|
| Study setting        | 9   | Description of study settings (eg, community clinic, academic hospital) and list of countries where data will be collected. Reference to where list of study sites can be obtained <input checked="" type="checkbox"/>                                                                                                                                                                                             |
| Eligibility criteria | 10  | Inclusion and exclusion criteria for participants. If applicable, eligibility criteria for study centres and individuals who will perform the interventions (eg, surgeons, psychotherapists) <input checked="" type="checkbox"/>                                                                                                                                                                                   |
| Interventions        | 11a | Interventions for each group with sufficient detail to allow replication, including how and when they will be administered <input checked="" type="checkbox"/>                                                                                                                                                                                                                                                     |
|                      | 11b | Criteria for discontinuing or modifying allocated interventions for a given trial participant (eg, drug dose change in response to harms, participant request, or improving/worsening disease) <input checked="" type="checkbox"/>                                                                                                                                                                                 |
|                      | 11c | Strategies to improve adherence to intervention protocols, and any procedures for monitoring adherence (eg, drug tablet return, laboratory tests) <input checked="" type="checkbox"/>                                                                                                                                                                                                                              |
|                      | 11d | Relevant concomitant care and interventions that are permitted or prohibited during the trial <input checked="" type="checkbox"/>                                                                                                                                                                                                                                                                                  |
| Outcomes             | 12  | Primary, secondary, and other outcomes, including the specific measurement variable (eg, systolic blood pressure), analysis metric (eg, change from baseline, final value, time to event), method of aggregation (eg, median, proportion), and time point for each outcome. Explanation of the clinical relevance of chosen efficacy and harm outcomes is strongly recommended <input checked="" type="checkbox"/> |
| Participant timeline | 13  | Time schedule of enrolment, interventions (including any run-ins and washouts), assessments, and visits for participants. A schematic diagram is highly recommended (see Figure) <input checked="" type="checkbox"/>                                                                                                                                                                                               |
| Sample size          | 14  | Estimated number of participants needed to achieve study objectives and how it was determined, including clinical and statistical assumptions supporting any sample size calculations <input checked="" type="checkbox"/>                                                                                                                                                                                          |
| Recruitment          | 15  | Strategies for achieving adequate participant enrolment to reach target sample size <input checked="" type="checkbox"/>                                                                                                                                                                                                                                                                                            |

## Methods: Assignment of interventions (for controlled trials)

### Allocation:

|                     |     |                                                                                                                                                                                                                                                                                                                                                                                              |
|---------------------|-----|----------------------------------------------------------------------------------------------------------------------------------------------------------------------------------------------------------------------------------------------------------------------------------------------------------------------------------------------------------------------------------------------|
| Sequence generation | 16a | Method of generating the allocation sequence (eg, computer-generated random numbers), and list of any factors for stratification. To reduce predictability of a random sequence, details of any planned restriction (eg, blocking) should be provided in a separate document that is unavailable to those who enrol participants or assign interventions <input checked="" type="checkbox"/> |
|---------------------|-----|----------------------------------------------------------------------------------------------------------------------------------------------------------------------------------------------------------------------------------------------------------------------------------------------------------------------------------------------------------------------------------------------|

|    |                |     |                                                                                       |
|----|----------------|-----|---------------------------------------------------------------------------------------|
| 1  |                |     |                                                                                       |
| 2  | Allocation     | 16b | Mechanism of implementing the allocation sequence (eg, central                        |
| 3  | concealment    |     | telephone; sequentially numbered, opaque, sealed envelopes),                          |
| 4  | mechanism      |     | describing any steps to conceal the sequence until interventions are                  |
| 5  |                |     | assigned <input checked="" type="checkbox"/>                                          |
| 6  |                |     |                                                                                       |
| 7  | Implementation | 16c | Who will generate the allocation sequence, who will enrol participants,               |
| 8  |                |     | and who will assign participants to interventions <input checked="" type="checkbox"/> |
| 9  |                |     |                                                                                       |
| 10 | Blinding       | 17a | Who will be blinded after assignment to interventions (eg, trial                      |
| 11 | (masking)      |     | participants, care providers, outcome assessors, data analysts), and                  |
| 12 |                |     | how <input checked="" type="checkbox"/>                                               |
| 13 |                |     |                                                                                       |
| 14 |                | 17b | If blinded, circumstances under which unblinding is permissible, and                  |
| 15 |                |     | procedure for revealing a participant's allocated intervention during                 |
| 16 |                |     | the trial <input checked="" type="checkbox"/>                                         |
| 17 |                |     |                                                                                       |
| 18 |                |     |                                                                                       |
| 19 |                |     |                                                                                       |

### Methods: Data collection, management, and analysis

|    |                 |     |                                                                                                |
|----|-----------------|-----|------------------------------------------------------------------------------------------------|
| 21 | Data collection | 18a | Plans for assessment and collection of outcome, baseline, and other                            |
| 22 | methods         |     | trial data, including any related processes to promote data quality (eg,                       |
| 23 |                 |     | duplicate measurements, training of assessors) and a description of                            |
| 24 |                 |     | study instruments (eg, questionnaires, laboratory tests) along with                            |
| 25 |                 |     | their reliability and validity, if known. Reference to where data                              |
| 26 |                 |     | collection forms can be found, if not in the protocol <input checked="" type="checkbox"/>      |
| 27 |                 |     |                                                                                                |
| 28 |                 | 18b | Plans to promote participant retention and complete follow-up,                                 |
| 29 |                 |     | including list of any outcome data to be collected for participants who                        |
| 30 |                 |     | discontinue or deviate from intervention protocols <input checked="" type="checkbox"/>         |
| 31 |                 |     |                                                                                                |
| 32 | Data            | 19  | Plans for data entry, coding, security, and storage, including any                             |
| 33 | management      |     | related processes to promote data quality (eg, double data entry;                              |
| 34 |                 |     | range checks for data values). Reference to where details of data                              |
| 35 |                 |     | management procedures can be found, if not in the protocol <input checked="" type="checkbox"/> |
| 36 |                 |     |                                                                                                |
| 37 | Statistical     | 20a | Statistical methods for analysing primary and secondary outcomes.                              |
| 38 | methods         |     | Reference to where other details of the statistical analysis plan can be                       |
| 39 |                 |     | found, if not in the protocol <input checked="" type="checkbox"/>                              |
| 40 |                 |     |                                                                                                |
| 41 |                 | 20b | Methods for any additional analyses (eg, subgroup and adjusted                                 |
| 42 |                 |     | analyses) <input checked="" type="checkbox"/>                                                  |
| 43 |                 |     |                                                                                                |
| 44 |                 | 20c | Definition of analysis population relating to protocol non-adherence                           |
| 45 |                 |     | (eg, as randomised analysis), and any statistical methods to handle                            |
| 46 |                 |     | missing data (eg, multiple imputation) <input checked="" type="checkbox"/>                     |
| 47 |                 |     |                                                                                                |
| 48 |                 |     |                                                                                                |
| 49 |                 |     |                                                                                                |
| 50 |                 |     |                                                                                                |
| 51 |                 |     |                                                                                                |

### Methods: Monitoring

|    |                 |     |                                                                                              |
|----|-----------------|-----|----------------------------------------------------------------------------------------------|
| 52 | Data monitoring | 21a | Composition of data monitoring committee (DMC); summary of its role                          |
| 53 |                 |     | and reporting structure; statement of whether it is independent from                         |
| 54 |                 |     | the sponsor and competing interests; and reference to where further                          |
| 55 |                 |     | details about its charter can be found, if not in the protocol.                              |
| 56 |                 |     | Alternatively, an explanation of why a DMC is not needed <input checked="" type="checkbox"/> |
| 57 |                 |     |                                                                                              |
| 58 |                 |     |                                                                                              |
| 59 |                 |     |                                                                                              |
| 60 |                 |     |                                                                                              |

|    |          |     |                                                                                                                                                                                                                       |
|----|----------|-----|-----------------------------------------------------------------------------------------------------------------------------------------------------------------------------------------------------------------------|
| 1  |          | 21b | Description of any interim analyses and stopping guidelines, including who will have access to these interim results and make the final decision to terminate the trial <input checked="" type="checkbox"/>           |
| 2  |          |     |                                                                                                                                                                                                                       |
| 3  |          |     |                                                                                                                                                                                                                       |
| 4  |          |     |                                                                                                                                                                                                                       |
| 5  |          |     |                                                                                                                                                                                                                       |
| 6  | Harms    | 22  | Plans for collecting, assessing, reporting, and managing solicited and spontaneously reported adverse events and other unintended effects of trial interventions or trial conduct <input checked="" type="checkbox"/> |
| 7  |          |     |                                                                                                                                                                                                                       |
| 8  |          |     |                                                                                                                                                                                                                       |
| 9  |          |     |                                                                                                                                                                                                                       |
| 10 |          |     |                                                                                                                                                                                                                       |
| 11 | Auditing | 23  | Frequency and procedures for auditing trial conduct, if any, and whether the process will be independent from investigators and the sponsor <input checked="" type="checkbox"/>                                       |
| 12 |          |     |                                                                                                                                                                                                                       |
| 13 |          |     |                                                                                                                                                                                                                       |
| 14 |          |     |                                                                                                                                                                                                                       |

### Ethics and dissemination

|    |                               |     |                                                                                                                                                                                                                                                                                                                         |
|----|-------------------------------|-----|-------------------------------------------------------------------------------------------------------------------------------------------------------------------------------------------------------------------------------------------------------------------------------------------------------------------------|
| 15 |                               |     |                                                                                                                                                                                                                                                                                                                         |
| 16 |                               |     |                                                                                                                                                                                                                                                                                                                         |
| 17 | Research ethics approval      | 24  | Plans for seeking research ethics committee/institutional review board (REC/IRB) approval <input checked="" type="checkbox"/>                                                                                                                                                                                           |
| 18 |                               |     |                                                                                                                                                                                                                                                                                                                         |
| 19 |                               |     |                                                                                                                                                                                                                                                                                                                         |
| 20 |                               |     |                                                                                                                                                                                                                                                                                                                         |
| 21 | Protocol amendments           | 25  | Plans for communicating important protocol modifications (eg, changes to eligibility criteria, outcomes, analyses) to relevant parties (eg, investigators, REC/IRBs, trial participants, trial registries, journals, regulators) <input checked="" type="checkbox"/>                                                    |
| 22 |                               |     |                                                                                                                                                                                                                                                                                                                         |
| 23 |                               |     |                                                                                                                                                                                                                                                                                                                         |
| 24 |                               |     |                                                                                                                                                                                                                                                                                                                         |
| 25 |                               |     |                                                                                                                                                                                                                                                                                                                         |
| 26 | Consent or assent             | 26a | Who will obtain informed consent or assent from potential trial participants or authorised surrogates, and how (see Item 32) <input checked="" type="checkbox"/>                                                                                                                                                        |
| 27 |                               |     |                                                                                                                                                                                                                                                                                                                         |
| 28 |                               |     |                                                                                                                                                                                                                                                                                                                         |
| 29 |                               |     |                                                                                                                                                                                                                                                                                                                         |
| 30 |                               | 26b | Additional consent provisions for collection and use of participant data and biological specimens in ancillary studies, if applicable <input checked="" type="checkbox"/>                                                                                                                                               |
| 31 |                               |     |                                                                                                                                                                                                                                                                                                                         |
| 32 |                               |     |                                                                                                                                                                                                                                                                                                                         |
| 33 | Confidentiality               | 27  | How personal information about potential and enrolled participants will be collected, shared, and maintained in order to protect confidentiality before, during, and after the trial <input checked="" type="checkbox"/>                                                                                                |
| 34 |                               |     |                                                                                                                                                                                                                                                                                                                         |
| 35 |                               |     |                                                                                                                                                                                                                                                                                                                         |
| 36 |                               |     |                                                                                                                                                                                                                                                                                                                         |
| 37 | Declaration of interests      | 28  | Financial and other competing interests for principal investigators for the overall trial and each study site <input checked="" type="checkbox"/>                                                                                                                                                                       |
| 38 |                               |     |                                                                                                                                                                                                                                                                                                                         |
| 39 |                               |     |                                                                                                                                                                                                                                                                                                                         |
| 40 |                               |     |                                                                                                                                                                                                                                                                                                                         |
| 41 | Access to data                | 29  | Statement of who will have access to the final trial dataset, and disclosure of contractual agreements that limit such access for investigators <input checked="" type="checkbox"/>                                                                                                                                     |
| 42 |                               |     |                                                                                                                                                                                                                                                                                                                         |
| 43 |                               |     |                                                                                                                                                                                                                                                                                                                         |
| 44 |                               |     |                                                                                                                                                                                                                                                                                                                         |
| 45 | Ancillary and post-trial care | 30  | Provisions, if any, for ancillary and post-trial care, and for compensation to those who suffer harm from trial participation <input checked="" type="checkbox"/>                                                                                                                                                       |
| 46 |                               |     |                                                                                                                                                                                                                                                                                                                         |
| 47 |                               |     |                                                                                                                                                                                                                                                                                                                         |
| 48 | Dissemination policy          | 31a | Plans for investigators and sponsor to communicate trial results to participants, healthcare professionals, the public, and other relevant groups (eg, via publication, reporting in results databases, or other data sharing arrangements), including any publication restrictions <input checked="" type="checkbox"/> |
| 49 |                               |     |                                                                                                                                                                                                                                                                                                                         |
| 50 |                               |     |                                                                                                                                                                                                                                                                                                                         |
| 51 |                               |     |                                                                                                                                                                                                                                                                                                                         |
| 52 |                               |     |                                                                                                                                                                                                                                                                                                                         |
| 53 |                               |     |                                                                                                                                                                                                                                                                                                                         |
| 54 |                               | 31b | Authorship eligibility guidelines and any intended use of professional writers <input checked="" type="checkbox"/>                                                                                                                                                                                                      |
| 55 |                               |     |                                                                                                                                                                                                                                                                                                                         |
| 56 |                               |     |                                                                                                                                                                                                                                                                                                                         |
| 57 |                               | 31c | Plans, if any, for granting public access to the full protocol, participant-level dataset, and statistical code <input checked="" type="checkbox"/>                                                                                                                                                                     |
| 58 |                               |     |                                                                                                                                                                                                                                                                                                                         |
| 59 |                               |     |                                                                                                                                                                                                                                                                                                                         |
| 60 |                               |     |                                                                                                                                                                                                                                                                                                                         |



**Appendices**

|                            |    |                                                                                                                                                                                                |
|----------------------------|----|------------------------------------------------------------------------------------------------------------------------------------------------------------------------------------------------|
| Informed consent materials | 32 | Model consent form and other related documentation given to participants and authorised surrogates                                                                                             |
| Biological specimens       | 33 | Plans for collection, laboratory evaluation, and storage of biological specimens for genetic or molecular analysis in the current trial and for future use in ancillary studies, if applicable |

---

\*It is strongly recommended that this checklist be read in conjunction with the SPIRIT 2013 Explanation & Elaboration for important clarification on the items. Amendments to the protocol should be tracked and dated. The SPIRIT checklist is copyrighted by the SPIRIT Group under the Creative Commons "[Attribution-NonCommercial-NoDerivs 3.0 Unported](#)" license.

For peer review only

# BMJ Open

## The restaurant interventions for salt reduction in China: a randomized controlled trial

|                                 |                                                                                                                                                                                                                                                                                                                                                                                                                                                                                                                                                                                                                                                                                                                                                                                                                                                                                                                                                                                                                                                                                                                                                                                                                                                                                                                                                                                                                                                                     |
|---------------------------------|---------------------------------------------------------------------------------------------------------------------------------------------------------------------------------------------------------------------------------------------------------------------------------------------------------------------------------------------------------------------------------------------------------------------------------------------------------------------------------------------------------------------------------------------------------------------------------------------------------------------------------------------------------------------------------------------------------------------------------------------------------------------------------------------------------------------------------------------------------------------------------------------------------------------------------------------------------------------------------------------------------------------------------------------------------------------------------------------------------------------------------------------------------------------------------------------------------------------------------------------------------------------------------------------------------------------------------------------------------------------------------------------------------------------------------------------------------------------|
| Journal:                        | <i>BMJ Open</i>                                                                                                                                                                                                                                                                                                                                                                                                                                                                                                                                                                                                                                                                                                                                                                                                                                                                                                                                                                                                                                                                                                                                                                                                                                                                                                                                                                                                                                                     |
| Manuscript ID                   | bmjopen-2020-038744.R1                                                                                                                                                                                                                                                                                                                                                                                                                                                                                                                                                                                                                                                                                                                                                                                                                                                                                                                                                                                                                                                                                                                                                                                                                                                                                                                                                                                                                                              |
| Article Type:                   | Protocol                                                                                                                                                                                                                                                                                                                                                                                                                                                                                                                                                                                                                                                                                                                                                                                                                                                                                                                                                                                                                                                                                                                                                                                                                                                                                                                                                                                                                                                            |
| Date Submitted by the Author:   | 11-Aug-2020                                                                                                                                                                                                                                                                                                                                                                                                                                                                                                                                                                                                                                                                                                                                                                                                                                                                                                                                                                                                                                                                                                                                                                                                                                                                                                                                                                                                                                                         |
| Complete List of Authors:       | Du, Wenwen; Chinese Center for Disease Control and Prevention National Institute for Nutrition and Health, Zhang, Jiguo; Chinese Center for Disease Control and Prevention National Institute for Nutrition and Health Li, Yuan; The George Institute for Global Health at Peking University Health Science Center He, Feng; Queen Mary University of London, Wolfson Institute of Preventive Medicine Zhou, Xue; Heilongjiang Provincial Center for Disease Control and Prevention Xu, Zhihua; Qinghai Provincial Center for Disease Control and Prevention, Gao, Yifu; Hebei Provincial Center for Disease Control and Prevention Yin, Lei; Hunan Provincial Center for Disease Control and Prevention Chang, Xiaoyu; Sichuan Provincial Center for Disease Control and Prevention Yan, Wei; Jiangxi Provincial Center for Disease Control and Prevention Tan, Monique; Wolfson Institute of Preventive Medicine, Barts and The London School of Medicine & Dentistry, Queen Mary University of London, Centre for Environmental and Preventive Medicine MacGregor, Graham; Queen Mary University of London, Wolfson Institute of Preventive Medicine Luo, Rong; The George Institute for Global Health at Peking University Health Science Center, Zhang, Puhong ; The George Institute for Global Health at Peking University Health Science Center Wang, Huijun; Chinese Center for Disease Control and Prevention National Institute for Nutrition and Health |
| <b>Primary Subject Heading</b>: | Public health                                                                                                                                                                                                                                                                                                                                                                                                                                                                                                                                                                                                                                                                                                                                                                                                                                                                                                                                                                                                                                                                                                                                                                                                                                                                                                                                                                                                                                                       |
| Secondary Subject Heading:      | Epidemiology, Evidence based practice, Nutrition and metabolism, Public health, Health policy                                                                                                                                                                                                                                                                                                                                                                                                                                                                                                                                                                                                                                                                                                                                                                                                                                                                                                                                                                                                                                                                                                                                                                                                                                                                                                                                                                       |
| Keywords:                       | EPIDEMIOLOGY, Health policy < HEALTH SERVICES ADMINISTRATION & MANAGEMENT, NUTRITION & DIETETICS, PUBLIC HEALTH, Protocols & guidelines < HEALTH SERVICES ADMINISTRATION & MANAGEMENT                                                                                                                                                                                                                                                                                                                                                                                                                                                                                                                                                                                                                                                                                                                                                                                                                                                                                                                                                                                                                                                                                                                                                                                                                                                                               |
|                                 |                                                                                                                                                                                                                                                                                                                                                                                                                                                                                                                                                                                                                                                                                                                                                                                                                                                                                                                                                                                                                                                                                                                                                                                                                                                                                                                                                                                                                                                                     |

1  
2  
3  
4  
5  
6  
7  
8  
9  
10  
11  
12  
13  
14  
15  
16  
17  
18  
19  
20  
21  
22  
23  
24  
25  
26  
27  
28  
29  
30  
31  
32  
33  
34  
35  
36  
37  
38  
39  
40  
41  
42  
43  
44  
45  
46  
47  
48  
49  
50  
51  
52  
53  
54  
55  
56  
57  
58  
59  
60

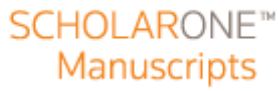

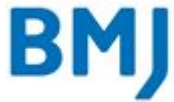

I, the Submitting Author has the right to grant and does grant on behalf of all authors of the Work (as defined in the below author licence), an exclusive licence and/or a non-exclusive licence for contributions from authors who are: i) UK Crown employees; ii) where BMJ has agreed a CC-BY licence shall apply, and/or iii) in accordance with the terms applicable for US Federal Government officers or employees acting as part of their official duties; on a worldwide, perpetual, irrevocable, royalty-free basis to BMJ Publishing Group Ltd ("BMJ") its licensees and where the relevant Journal is co-owned by BMJ to the co-owners of the Journal, to publish the Work in this journal and any other BMJ products and to exploit all rights, as set out in our [licence](#).

The Submitting Author accepts and understands that any supply made under these terms is made by BMJ to the Submitting Author unless you are acting as an employee on behalf of your employer or a postgraduate student of an affiliated institution which is paying any applicable article publishing charge ("APC") for Open Access articles. Where the Submitting Author wishes to make the Work available on an Open Access basis (and intends to pay the relevant APC), the terms of reuse of such Open Access shall be governed by a Creative Commons licence – details of these licences and which [Creative Commons](#) licence will apply to this Work are set out in our licence referred to above.

Other than as permitted in any relevant BMJ Author's Self Archiving Policies, I confirm this Work has not been accepted for publication elsewhere, is not being considered for publication elsewhere and does not duplicate material already published. I confirm all authors consent to publication of this Work and authorise the granting of this licence.

**The restaurant interventions for salt reduction in China: a randomized controlled trial**

Wenwen Du<sup>1</sup>, Jiguo Zhang<sup>1</sup>, Yuan Li<sup>2</sup>, Feng J He<sup>3</sup>, Xue Zhou<sup>4</sup>, Zhihua Xu<sup>5</sup>, Yifu Gao<sup>6</sup>, Lei Yin<sup>7</sup>,  
Xiaoyu Chang<sup>8</sup>, Wei Yan<sup>9</sup>, Monique Tan<sup>3</sup>, Graham A MacGregor<sup>3</sup>, Rong Luo<sup>2</sup>, Puhong Zhang<sup>2</sup>,  
Huijun Wang<sup>1</sup>

<sup>1</sup>The National Institute for Nutrition and Health, Chinese Center for Disease Control and Prevention, Beijing, China

<sup>2</sup>The George Institute for Global Health at Peking University Health Science Center, Beijing, China

**Acknowledgements**

<sup>3</sup>Wolfson Institute of Preventive Medicine, Barts and The London School of Medicine & Dentistry, Queen Mary University of London, London, UK

<sup>4</sup>Heilongjiang Provincial Center for Disease Control and Prevention, Harbin, China

<sup>5</sup>Qinghai Provincial Center for Disease Control and Prevention, Xining, China

<sup>6</sup>Hebei Provincial Center for Disease Control and Prevention, Shijiazhuang, China

<sup>7</sup>Hunan Provincial Center for Disease Control and Prevention, Changsha, China

<sup>8</sup>Sichuan Provincial Center for Disease Control and Prevention, Chengdu, China

<sup>9</sup>Jiangxi Provincial Center for Disease Control and Prevention, Nanchang, China

**Corresponding authors**

Puhong Zhang and Huijun Wang are joint corresponding authors.

Prof Puhong Zhang:

zpuhong@georgeinstitute.org.cn;

Peking University Health Science Center Room 011, Unit 2, Tayuan Diplomatic Office Building

No. 14 Liangmahe Nan Lu, Chaoyang District, Beijing, China; and

Prof Huijun Wang:

wanghj@nih.chinacdc.cn.

29 Nanwei Rd, Xicheng District, Beijing, China.

**Word count:** 3711.

**ABSTRACT**

**Introduction** Salt intake in China is high, and most of it comes from that added by consumers.

1  
2  
3  
4 Nevertheless, recent years have seen a rapid increase in the frequency at which people eat out. The  
5 aim of this study is to evaluate the effectiveness of interventions designed for salt reduction in  
6 restaurants through a randomized controlled trial in China.  
7  
8

9 **Methods and analysis** As a randomized controlled trial with restaurants as study subjects, we  
10 recruited 192 restaurants from 12 counties of 6 provinces in China. After the baseline survey,  
11 restaurants were randomly assigned to intervention or control group. Using social cognitive theory,  
12 comprehensive intervention activities were designed to encourage salt reduction in all restaurant  
13 foods, and at the same time, to encourage consumers to choose lower-salt options when eating out.  
14 The interventions will be conducted only in restaurants of the intervention group during the first  
15 year. The follow-up assessment will be conducted at the end of the trial. The primary outcome is  
16 the change in the average salt content of the 5 best-selling dishes of the restaurant, as measured by  
17 laboratory tests. Secondary outcomes include differences in the monthly use of salt and salty  
18 condiments between intervention and control restaurants, and the knowledge, attitude and practice  
19 (KAP) on salt among restaurant consumers.  
20  
21  
22  
23  
24  
25  
26  
27  
28  
29

30 **Ethics and dissemination** The study was reviewed and approved by the Review Board of the  
31 National Institute for Nutrition and Health, China CDC, and Queen Mary Research Ethics  
32 Committee. Results will be disseminated through presentations, publications and social media.  
33  
34  
35

36 **Trial registration number** ChiCTR1800019694  
37  
38  
39

#### 40 **Strengths and limitations of this study**

41 The study develops an effective and sustainable intervention package for salt reduction in Chinese  
42 restaurant settings.  
43  
44

45 Our study covers a wide range of restaurants in China, from 6 provinces and thus representing  
46 different cuisines and eating habits.  
47  
48

49 Due to the commercial nature of restaurants, the implementation of the salt reduction interventions  
50 may be challenging, and need strong multisector support and cooperation.  
51  
52  
53  
54

## 55 **INTRODUCTION**

56 High salt intake is one of the leading dietary risk factors for deaths and disability globally<sup>1</sup> and  
57 associated with 3 million deaths and 70 million DALYs in adults around the world. In China, high  
58  
59  
60

1  
2  
3  
4 salt intake attributed to more than 0.5 million cardiometabolic deaths in 2010-12.<sup>2</sup> The most  
5  
6 common risk of high salt intake is raised blood pressure, which alone accounted for an estimated  
7  
8 10.7 million deaths each year worldwide.<sup>3</sup> Statistics from the 2015 China's Report on Nutrition and  
9  
10 Chronic Diseases revealed that the prevalence of hypertension among the Chinese population aged  
11  
12 18 years and older was 25.2% in 2012,<sup>4</sup> with the total number of individuals with high blood  
13  
14 pressure reaching 270 million. International experience had proved that reducing population salt  
15  
16 intake lowered blood pressure and reduced the risk of cardiovascular disease (CVD).<sup>5 6</sup> Salt  
17  
18 reduction is considered one of the most cost-effective measures to improve public health.<sup>7</sup> In China,  
19  
20 the average salt intake was 12-14g salt per day, which was more than double the WHO-  
21  
22 recommended maximum level of 5g salt per day for adults.<sup>8 9</sup>

23  
24 With the rapid urbanization and lifestyle changes in China, eating in restaurants has been becoming  
25  
26 popular, especially in urban areas. National survey (2010-12) statistics showed that, 35.5% of the  
27  
28 Chinese aged 6 years and older had eaten out in the past week. The proportion of people dining out  
29  
30 was 42.2% and 28.5% in urban and rural areas respectively.<sup>4</sup> Restaurants became the second major  
31  
32 dining location after home-cooking in China, and this had important impacts on public health and  
33  
34 nutrition. A pilot study using a one-week salt estimation method in Beijing found that approximately  
35  
36 40% of the salt intake was consumed outside the home.<sup>10</sup> Restaurant dishes seemed to have a high  
37  
38 sodium content in both developed and developing countries.<sup>11-14</sup> A study showed that 46.8% of the  
39  
40 dishes served in Chinese restaurants in Beijing contained more salt than the daily salt intake  
41  
42 recommended by WHO.<sup>14</sup> Sodium content was substantially higher in restaurant foods than in  
43  
44 home-made foods.<sup>15-17</sup> Therefore, to help consumers reduce their overall salt intake, it is important  
45  
46 to develop an effective strategy to reduce the sodium content of restaurant foods.

47  
48 To tackle the high salt intake levels in China, Action on Salt China (ASC) was set up in 2017, funded  
49  
50 by the UK National Institute for Health Research (NIHR). ASC aimed to implement comprehensive  
51  
52 national salt reduction programs, with the leadership of Queen Mary University of London  
53  
54 (QMUL), the George Institute China (TGI), Chinese Center for Disease Control and Prevention  
55  
56 (China CDC) and other key related organizations.<sup>18</sup> The ASC team developed two national health  
57  
58 campaigns (health education and salt reduction in packaged food) and four randomized controlled  
59  
60 trials (RCTs) to test interventions targeting the major sources of salt intake<sup>19</sup>. The RCTs consisted  
of (1) an application-based intervention study in schoolchildren and their families (AIS);<sup>20</sup> (2) a

1  
2  
3  
4 home cook-based intervention study (HIS); (3) a comprehensive intervention study (CIS);<sup>21</sup> and (4)  
5 a restaurant-based intervention study (RIS), which is the one reported in the present paper.

6  
7 The objective of RIS was to reduce salt use by at least 0.5g per 100g in restaurant dishes. To achieve  
8 the goal, we developed a restaurant salt reduction package, the feasibility and effectiveness of which  
9 are being tested by RIS. The key interventions were based on social cognitive theory<sup>22</sup> and included:  
10 (1) building tailored restaurant environments that encourage consumers to order lower-salt or  
11 reduced-salt dishes; (2) lower-salt or reduced-salt ordering reminders from the waiters; (3) training  
12 cooks in reduced-salt cooking; (4) salt reduction campaigns. As a part of the ASC program, this  
13 article reports on the design of the RIS intervention package and its implementation, evaluation, and  
14 current status.  
15  
16  
17  
18  
19  
20  
21  
22  
23  
24

## 25 **METHODS AND ANALYSIS**

### 26 **Study setting and sampling method**

27  
28 To account for geographical, economic and dietary disparities, our study was carried out in 6  
29 provinces of China, which were consistent with other RCTs of ASC, covering north (Heilongjiang,  
30 Hebei, Qinghai) and south (Hunan, Sichuan and Jiangxi) China. As a RCT, the RIS baseline survey,  
31 which included the assessment of laboratory sodium level of 5 best-selling dishes, restaurant  
32 environment and attitude on salt reduction, detailed recipe information, and consumers' knowledge,  
33 attitude and practice (KAP) on salt reduction in each restaurant, was conducted in May 2019, and  
34 an evaluation survey with the same assessments will be conducted after 1-year follow-up, at the end  
35 of the trial. 192 restaurants were selected from 12 counties of the above-mentioned 6 provinces. In  
36 each province, 2 counties of similar socioeconomic level in the provincial capital city were selected.  
37 The counties that had participated in other salt-reduction projects were excluded to minimize  
38 contamination. To determine the effectiveness of the salt reduction package in restaurants of  
39 different sizes, of the 16 Chinese restaurants selected from each county, it was ensured these  
40 included 4 large restaurants, 8 medium restaurants and 4 small restaurants. The restaurants in each  
41 county were then randomly allocated to the intervention or control group after the baseline survey,  
42 using the random procedure on electronic data recording platform (EDC). The comprehensive  
43 intervention package was designed to both inspire the consumers to demand for lower salt dishes  
44 and promote the skills of reduced-salt cooking and ordering service in restaurant staff.  
45  
46  
47  
48  
49  
50  
51  
52  
53  
54  
55  
56  
57  
58  
59  
60



### Restaurant inclusion criteria and recruitment

Firstly, we released an open letter via local Media and cooperated with the Market Regulation Bureau to recruit restaurants which were interested in participating in the program. Then the standard inclusion criteria were used to screen for potential restaurants, including: (1) restaurants mainly offering Chinese cuisine; (2) agreeing to participate in 1 year of comprehensive salt reduction intervention and in at least two assessment surveys (baseline and follow-up surveys); (3) with complete records of salt and other condiments purchase and usage; (4) had been operating normally for more than 1 year and without plan of relocating or closing in the next 2 years; (5) with >50% of the dishes that could be prepared with less salt. Restaurants that were already involved in other salt reduction programs will be excluded. Restaurant size was determined based on surface area or number of seats (table 1). Finally, 16 restaurants in each country were selected according to the above inclusion and exclusion criteria, including 4 large-size, 8 medium-size and 4 small-size restaurants.

Table 1 Restaurant size classification

| Classification    | Square meters (m <sup>2</sup> ) | (or) Number of seats |
|-------------------|---------------------------------|----------------------|
| Large restaurant  | >500 and ≤3000                  | >250 and ≤1000       |
| Medium restaurant | >150 and ≤500                   | >75 and ≤250         |
| Small restaurant  | ≤150                            | ≤75                  |

### Randomization

After baseline assessment, restaurants were randomly allocated to either the control group or the intervention group (96 restaurants in each group). The randomization was stratified by the size of restaurants and carried out using computer generated random numbers by a statistician who was not involved in the study and blind to the identity of the restaurants. Following the baseline survey, the restaurants allocated to the intervention group implemented a series of salt reduction activities. Meanwhile, the control restaurants operated as usual.

### Intervention

The objective of RIS was to reduce salt use in restaurants. We aimed to achieve not only short-term, but also sustainable long-term effects. Social cognitive theory proposes behavior was influenced by

1  
2  
3  
4 the constant interaction of personal factors (ie. skills, knowledge) and environmental factors (ie.  
5 appropriate modeling for learning, available materials)<sup>22</sup>. Therefore, we designed the intervention  
6 activities based on both the supply (restaurant) and demand (consumer) sides (Figure 1). For the  
7 intervention group, the RIS intervention package included the following activities:  
8  
9  
10

11  
12  
13 Figure 1 The RIS intervention design  
14

15 (1) Menu labelling:

16  
17 In the baseline survey, we collected the detailed ingredients composition, including the amount of  
18 salt and condiments, of the 50 best-selling dishes of each restaurant. If a restaurant offers fewer than  
19 50 dishes, information on all available dishes were collected. In each restaurant, the 10% of the  
20 dishes that had the lowest sodium content (according to baseline survey) were labelled “lower salt”  
21 on the menu, thus providing clear information to the customers. This menu will be used in the  
22 intervention restaurants throughout the 1- year trial period.  
23  
24  
25  
26  
27  
28

29 (2) Training for chef and waiter/waitress:

30  
31 In close collaboration with culinary experts, we developed a series of training materials, including  
32 manual and videos, to guide chefs and waiters/waitresses in encouraging salt reduction services in  
33 their routine work. Besides, we organized the service of a professional team to offer face-to-face  
34 training for the restaurant staff of each county at least once a year. At least 3 representatives per  
35 restaurant were required to attend the training. This training mainly focused on the following  
36 aspects: “salt sources in restaurant dishes”, “why reduce salt”, “practical skills in reducing salt for  
37 restaurant cooking”, “building a reduced-salt environment in a restaurant” and “service and  
38 communication skills”. Local county investigators were responsible to enhance the knowledge and  
39 skills among staff in each intervention restaurant by conducting monthly follow-up supervisions.  
40  
41  
42  
43  
44  
45  
46  
47

48 During the trial, each intervention restaurant was encouraged to reduce salt usage by 10% in all  
49 dishes, and greater reductions according to the customers’ request (such as, -30% or -50% salt).  
50 Furthermore, at least 3 lower-salt dishes (sodium  $\leq$  100mg/100g) per restaurant should be developed  
51 through reformulation to provide customers more options of lower-salt dishes. Waiters/waitresses  
52 were required to recommend customers the lower-salt dishes, as well as remind them they can  
53 choose the reduced-salt option with almost all the other dishes.  
54  
55  
56  
57  
58  
59

60 (3) Supportive environment for salt reduction in restaurants:

1  
2  
3  
4 Information that refers to salt reduction, salt and health, and available reduced-salt dishes were  
5 shown through videos, posters, brochures, leaflets, and table displays to build restaurant  
6 environments that makes it easier for the customers to choose lower-salt options. For example,  
7 messages with announcement “-30%/-50% salt options were available for most dishes” will be  
8 posted on dining tables. These materials should be displayed at noticeable positions in the  
9 intervention restaurants during the trial period.

#### 15 (4) Salt reduction campaign:

16  
17 To create a social environment supportive of salt reduction, local investigators were encouraged to  
18 organize a campaign at least once during the 1-year trial, with the theme of “less salt, healthy  
19 eating”, to help raise consumers’ awareness of salt reduction when they eat out. Another import aim  
20 was to encourage restaurants to pay more attention to reducing salt and offering lower-salt dishes.  
21 To expand the reach of the campaign, news agencies and social media were used to disseminate the  
22 campaign messages. To limit contamination to control group, the salt reduction campaign should  
23 only involve the restaurants in intervention group.

24  
25 Certified medals of “ASC Salt Reducing Restaurant” were granted to intervention restaurants,  
26 according to the standardized requirements. The medal will help motivate restaurants for salt  
27 reduction and value their efforts.

#### 38 **Sample size**

39  
40 In the current randomized controlled trial, selected restaurants were the study subjects. Based on the  
41 results of a study on Chinese restaurants,<sup>23</sup> we assumed a standard deviation (SD) of 1g/100g of  
42 dish for the sodium content of Chinese restaurant dishes, and expected that a sample of 192  
43 restaurants would achieve 80% power (with two-sided  $\alpha=0.05$ ) to detect a change in salt content  
44 by 0.5 g/100g dish for the 5 best-selling dishes in each restaurant, allowing for a 20% dropping rate  
45 of restaurants. Therefore, a total of 192 restaurants were recruited into the study.

#### 54 **Outcome measures**

55  
56 The primary outcome was the differences between the intervention and control groups in the change  
57 of the sodium content of the 5 best-selling dishes from baseline to the end of the trial (Figure 2).

58  
59 Secondary outcomes included the differences between the intervention and control groups in: (1)  
60

1  
2  
3  
4 monthly use of salt and main salty condiments by the restaurant chefs; (2) salt-related knowledge,  
5  
6 attitude and practice (KAP) in restaurant customers.  
7  
8

9  
10 Figure 2 RIS trial design  
11  
12

### 13 **Outcome assessments**

14  
15 The primary and secondary outcomes should be assessed before and after the 1-year intervention,  
16  
17 in both intervention and control restaurants.  
18

19 For the primary outcome, we collected the whole portion of the 5 best-selling dishes of each  
20  
21 restaurant at baseline and follow-up, to test their sodium content using laboratory flame atomic  
22  
23 absorption spectrometry method. Although it would be possible to estimate the sodium content of a  
24  
25 dish by asking the chefs what ingredients and condiments they have used, this would rely on the  
26  
27 chefs' memory. By using laboratory tests, we ensured the accurate assessment of the sodium content  
28  
29 of the dishes. The dishes chosen for laboratory test should be top-selling firstly, and then involve  
30  
31 different types according to the ingredients (ie. animal food based dishes, mixed food dishes, and  
32  
33 vegetable food based dishes). The local researchers went to each restaurant and bought the 5 best-  
34  
35 selling dishes anonymously in order to avoid introducing bias. The whole dishes, including sauce  
36  
37 and soup when appropriate, were weighed and photographed. Once cooled off, they were transferred  
38  
39 to a sampling bag. The samples were stored at -20°C freezer until transferred to the laboratory.  
40  
41 Theoretically, for each restaurant, the same dishes bought at a similar date of the year should be  
42  
43 assessed at baseline and follow-up assessment. However, if the dishes collected at baseline are no  
44  
45 longer sold at the follow-up assessment, comparable dishes with similar ingredients and cooking  
46  
47 method could be chosen as alternatives.  
48

49 For the secondary outcomes, questionnaires were administered by trained local investigators  
50  
51 through a mobile EDC app developed for RIS. Compared to traditional data collection methods, the  
52  
53 mobile EDC had advantages in terms of process and quality control, as demonstrated in a previous  
54  
55 clinical trial<sup>24</sup>. There were two questionnaires in the survey, including restaurant assessment and  
56  
57 consumer survey. The questions related to the restaurant assessment consisted of: (1) basic  
58  
59 information about the restaurant; (2) salt reduction environment and services in restaurant; (3)  
60

1  
2  
3  
4 monthly salt and salty condiments usage; (4) attitude and challenges related to reducing salt in  
5 restaurant; (5) dishes ( $\leq 50$  dishes/restaurant) recipe (all ingredients and condiments used, and in  
6 what quantity) and cooking method. The restaurant-related questions were asked to the  
7 owners/managers who directly manage the restaurant, and the recipes were collected by face-to-  
8 face interview with chefs who were familiar with preparing those dishes. To assist chefs in  
9 remembering accurately the amount of ingredients used in the dishes, the investigators could show  
10 them the weighed amount using a usual spoon or other measuring instruments used in their  
11 restaurants.  
12

13  
14  
15 For the consumer survey, we randomly selected 20 customers (10 males and 10 females) in all  
16 intervention and control restaurants, before and after the trial, to assess the changes and differences  
17 of knowledge, attitudes, and behaviours related to salt reduction.  
18

## 19 **Data collection, management and analysis**

### 20 **Data collection**

21 We used the specially designed mobile EDC to collect assessments data during the RIS program, as  
22 well as monthly supervision records in the 1-year comprehensive intervention. The local CDCs were  
23 responsible for data collection. The structure of data collection system consisted of 192 restaurants.  
24 The local researchers logged in the system, input the assessment data and supervision records in  
25 each restaurant page. The assessment data included: (1) information on restaurants' salt reduction-  
26 related environment, service, attitude, challenges, and monthly salt usage, as well as some sales  
27 data; (2) information on recipe, cooking method, and laboratory sodium content; (3) information on  
28 customer knowledge, attitude, and behaviors related to salt reduction. To collect the primary  
29 indicator-laboratory measured sodium contents of the best-selling dishes, the local investigators  
30 went to each restaurant and buy the 5 best-selling dishes anonymously, then put them totally into  
31 the sampling bags, weighed the amount, stored at  $-20^{\circ}\text{C}$  in refrigerator, and finally transferred to  
32 the designated laboratory for sodium test. Monthly supervision records included information on the  
33 process of intervention activities, and any reason for not carrying them out, as well as photos that  
34 could inform on the intervention status.  
35

### 36 **Data management**

37 The mobile EDC used in the RIS program was developed by the Beijing University of Aeronautics  
38  
39  
40  
41  
42  
43  
44  
45  
46  
47  
48  
49  
50  
51  
52  
53  
54  
55  
56  
57  
58  
59  
60

1  
2  
3  
4 and Astronautics. The security of data management was demonstrated in another publication under  
5 the same ASC project <sup>20</sup>. To ensure the data validation and detection of keying errors, the EDC  
6 system set rules of logic jump for associated questions, and abnormal values recognition. To  
7 guarantee the integrity and authenticity of data collection, local researchers were given different  
8 level of authority according to their roles. For example, the local investigators were responsible for  
9 inputting survey and supervision data, but could not delete the records they added. The inspectors  
10 had authority to check the data accuracy, delete mistaken records, start and close discussion about  
11 doubtful data, but cannot add new records. The person in charge at county, provincial and national  
12 levels, could view the data of all restaurants under their management, but could not make any  
13 changes. All modifications were clearly recorded in the EDC system.  
14  
15  
16  
17  
18  
19  
20  
21  
22

### 23 **Statistical analysis**

24  
25 The effect of the intervention package for restaurants on the primary or secondary outcomes will be  
26 determined using linear mixed models, including group (intervention, control), time (baseline,  
27 follow-up), and interaction of group\*time, with adjustments for potential confounding variables,  
28 such as restaurant size, cooking method and dish category, etc. We will consider sensitivity analyses  
29 to examine the robustness of the conclusion of the primary analysis. Results will be described as  
30 mean, SD, standard error (SE), and 95% confidence interval where appropriate. SAS 9.4 will be  
31 used for the data cleaning and statistical analyses. All analyses will be two sided, and  $P < 0.05$  will  
32 be considered significant.  
33  
34  
35  
36  
37  
38  
39

### 40 **Economic and process evaluation**

41  
42 Economic evaluation will be conducted from the health sector perspective to compare the  
43 comprehensive intervention package for restaurant on salt reduction versus business as usual, and it  
44 will include two dimensions: a trial-based economic evaluation, and a modelled economic  
45 evaluation of long-term costs and outcomes. Intervention costs will include the direct costs of  
46 running the program, excluding any research and development costs. We will consider restaurant  
47 dishes consumption at the population level for the economic evaluation. Therefore, the trial-based  
48 economic evaluation will be assessed in terms of incremental cost per unit salt reduction in  
49 restaurant dishes and systolic blood pressure (BP). The conversion of sodium in restaurant dishes to  
50 daily sodium intake for the population, and its relationship with systolic BP, will be based on the  
51 scientific literature and other population trials under the ASC project. The modelled economic  
52  
53  
54  
55  
56  
57  
58  
59  
60

1  
2  
3  
4 evaluation will examine the cost, survival, health states (including death and CVD events) to  
5 estimate incremental cost per life year saved and cost per quality-adjusted life year gained. The  
6 transition probabilities across health states and costs attached to different health states, and the long-  
7 term effects of reduction in sodium intake will be based on literature data. Sensitivity analyses will  
8 be used to estimate uncertainty about the primary findings associated with various key parameters.  
9  
10 The process evaluation will help us assess the fidelity and adoption of key components of  
11 intervention (frequency, coverage and satisfaction), and understand the barriers and facilitators of  
12 the intervention. The evaluation will be conducted using mixed-methods during and at the end of  
13 the trial, from monthly supervision records, structured process evaluation form, and in-depth  
14 interviews with restaurant staff and customers. Designed forms, including sales form of lower-salt  
15 labeling dishes, recipe information form of reduced-salt dishes, and consumer feedback cards will  
16 be collected at three time points during the intervention period, in order to monitor the acceptance  
17 and the effect of the RIS intervention.  
18  
19  
20  
21  
22  
23  
24  
25  
26  
27  
28

### 29 **Project status and timelines**

30  
31 The recruitment of restaurants started in April 2019. Baseline survey was conducted between May  
32 and June 2019. 192 restaurants from 12 counties completed the assessments, with data of 976  
33 laboratory-tested dishes, 8145 recipes, and 3840 customers. Theoretically, the follow-up survey will  
34 be conducted in the middle 2020, after 12 months' intervention. Due to the pandemic of novel  
35 coronavirus disease (COVID-19) in early 2020, restaurants were temporarily closed in all the  
36 provinces of China. According to the feedback from the 12 counties, all of restaurants in our study  
37 were closed from late January to early April.  
38 We will evaluate influences of the COVID-19 pandemic on restaurants, especially on those in the  
39 intervention group, and decide on whether to postpone the follow-up assessment and other issues.  
40  
41  
42  
43  
44  
45  
46  
47

### 48 **Expected outcome and potential impact**

49  
50 Unlike the standardized menus found in western fast food chains, Chinese dishes vary considerably  
51 by areas, restaurants, and chefs, even for dishes with the same name. Few studies existed on the  
52 sodium content of restaurant dishes in China.<sup>14 25</sup> The current study covered a wide range of  
53 restaurants in 6 provinces, could provide the evidence on the sodium level and sources in Chinese  
54 restaurants, which will be very helpful to develop the specific intervention measures. The study  
55 aimed to explore a feasible, effective and sustainable approach to achieve salt reduction for Chinese  
56  
57  
58  
59  
60

1  
2  
3  
4 restaurants. With an increasing proportion of people eating out, restaurant dishes contributed much  
5  
6 more sodium than decades before and induced more health risks. Compared with salt reduction  
7  
8 initiatives in individuals, communities or schools, those conducted in restaurants may face more  
9  
10 challenges. With this study, we will identify barriers and facilitators for implementation, as well as  
11  
12 solutions suitable to Chinese restaurants to reduce salt. Based on these findings, we will be able to  
13  
14 draw important public health implications.

### 15 **Patient and public involvement**

16  
17 Using information on the current situation of Chinese restaurants, inclusion criteria were determined  
18  
19 before the recruitment. An open letter was disseminated via local media, introducing the RIS project  
20  
21 and calling for participation publicly. Local CDC investigators, with support from the  
22  
23 Administration for Market Regulation, made various mobilization efforts to help restaurant owners  
24  
25 understand the purpose of the project and the information to be collected in the investigation. With  
26  
27 the consent of selected restaurants, we conducted assessment surveys and implemented the  
28  
29 intervention. At the end of the study, we will disseminate the results to the restaurants, and discuss  
30  
31 with related stakeholders how to translate the research findings into practice and develop a public  
32  
33 health strategy.

### 34 **ETHICS AND DISSEMINATION**

35  
36 According to the results of ethics review by the Review Board of the National Institute for Nutrition  
37  
38 and Health, China CDC, and Queen Mary Research Ethics Committee, written informed consent  
39  
40 from restaurants and consumers were exempted from the RIS project. However, the investigators  
41  
42 should fully inform the selected restaurants and consumers of the purpose and activities of the  
43  
44 project, strive for understanding and cooperation, and keep the information confidential. The  
45  
46 restaurants and consumers will be free to discontinue their participation at any time without giving  
47  
48 any reasons.

49  
50 The findings of this research will be disseminated through conference presentations, peer-reviewed  
51  
52 publications, press release and social media.

### 53 **Author affiliations**

54  
55  
56 <sup>1</sup>The National Institute for Nutrition and Health, Chinese Center for Disease Control and Prevention,  
57  
58 Beijing, China

59  
60 <sup>2</sup>The George Institute for Global Health at Peking University Health Science Center, Beijing, China



## Acknowledgements

<sup>3</sup>Wolfson Institute of Preventive Medicine, Barts and The London School of Medicine & Dentistry, Queen Mary University of London, London, UK

<sup>4</sup>Heilongjiang Provincial Center for Disease Control and Prevention, Harbin, China

<sup>5</sup>Qinghai Provincial Center for Disease Control and Prevention, Xining, China

<sup>6</sup>Hebei Provincial Center for Disease Control and Prevention, Shijiazhuang, China

<sup>7</sup>Hunan Provincial Center for Disease Control and Prevention, Changsha, China

<sup>8</sup>Sichuan Provincial Center for Disease Control and Prevention, Chengdu, China

<sup>9</sup>Jiangxi Provincial Center for Disease Control and Prevention, Nanchang, China

**Acknowledgements** The authors would like to thank the restaurant managers, chefs and servicers, consumers, local administration for market regulation, experts of Sichuan Tourism University for their opinions on the development of the intervention program.

**Contributors** PZ and FJH conceived the project. WD, JZ, HW, YL, FJH and PZ participated in study design and implementation. WD, JZ, HW, YL, PZ, FJH, XZ, HX, YG, LY, XC and WY facilitates restaurant and public involvement and were responsible for setting up the study in each site. All authors contributed to the development of intervention and evaluation. WD wrote the first draft of the manuscript, and JZ, HW, YL, PZ, FJH, MT, GAM and RL revised the draft. All authors contributed to the refinement of the study protocol and approved the final manuscript.

**Funding** This work is supported by the National Institute for Health Research (NIHR, NIHR Global Health Research Unit Action on Salt China at Queen Mary University of London) using Official Development Assistance (ODA) funding (16/136/77). The views expressed in this publication are those of the author(s) and not necessarily those of the NIHR or the Department of Health and Social Care.

**Disclaimer** The findings of this study will be disseminated through discussions or presentations at conferences, peer-reviewed publications and general media.

**Competing interests** FJH is a member of the Consensus Action on Salt & Health (CASH), a non-profit charitable organization, and its international branch World Action on Salt & Health (WASH). FJH does not receive any financial support from CASH or WASH. GAM is the chairman of Blood Pressure UK (BPUK), chairman of CASH and chairman of WASH and does not receive any financial support from any of these organizations. BPUK, CASH and WASH are non-profit

charitable organizations. All other authors have no competing interests to declare.

**Patient consent for publication** Not required.

**Ethics approval** The study has been reviewed and approved by the Review Board of the National Institute for Nutrition and Health, China CDC (20180314), and Queen Mary Research Ethics Committee (QMERC2018/14).

**Provenance and peer review** Not mentioned; externally peer reviewed.

**Open access** This is an open access article distributed in accordance with the Creative Commons Attribution Non Commercial (CC BY-NC 4.0) license, which permits others to distribute, remix, adapt, build upon this work non-commercially, and license their derivative works on different terms, provided the original work is properly cited, appropriate credit is given, any changes made indicated and the use is non-commercial. See: <http://creativecommons.org/licenses/by-nc/4.0/>.

## REFERENCES

1. Collaborators GBDD. Health effects of dietary risks in 195 countries, 1990-2017: a systematic analysis for the Global Burden of Disease Study 2017. *Lancet* 2019;393(10184):1958-72.
2. He Y, Li Y, Yang X, et al. The dietary transition and its association with cardiometabolic mortality among Chinese adults, 1982-2012: a cross-sectional population-based study. *Lancet Diabetes Endocrinol* 2019;7(7):540-48.
3. Forouzanfar MH, Liu P, Roth GA, et al. Global Burden of Hypertension and Systolic Blood Pressure of at Least 110 to 115 mm Hg, 1990-2015. *JAMA* 2017;317(2):165-82.
4. Bureau of National Health and Family Planning Commission Disease Prevention and Control. Report on Chinese Residents' Chronic Diseases and Nutrition. Beijing: *People's Medical Publishing House*, 2015.
5. Aburto NJ, Ziolkovska A, Hooper L, et al. Effect of lower sodium intake on health: systematic review and meta-analyses. *BMJ* 2013;346:f1326.
6. He FJ, Li J, Macgregor GA. Effect of longer term modest salt reduction on blood pressure: Cochrane systematic review and meta-analysis of randomised trials. *BMJ* 2013;346:f1325.
7. Asaria P, Chisholm D, Mathers C, et al. Chronic disease prevention: health effects and financial costs of strategies to reduce salt intake and control tobacco use. *Lancet* 2007;370(9604):2044-53.
8. Anderson CA, Appel LJ, Okuda N, et al. Dietary sources of sodium in China, Japan, the United

- 1  
2  
3  
4 Kingdom, and the United States, women and men aged 40 to 59 years: the INTERMAP study. *J*  
5 *Am Diet Assoc* 2010;110(5):736-45.  
6  
7  
8 9. He FJ, Wu Y, Feng XX, et al. School based education programme to reduce salt intake in children  
9 and their families (School-EduSalt): cluster randomised controlled trial. *BMJ* 2015;350:h770.  
10  
11 10. Zhao F, Zhang P, Zhang L, et al. Consumption and sources of dietary salt in family members in  
12 Beijing. *Nutrients* 2015;7(4):2719-30.  
13  
14 11. Ahuja JK, Wasswa-Kintu S, Haytowitz DB, et al. Sodium content of popular commercially  
15 processed and restaurant foods in the United States. *Prev Med Rep* 2015;2:962-7.  
16  
17 12. Wolfson JA, Moran AJ, Jarlenski MP, et al. Trends in Sodium Content of Menu Items in Large  
18 Chain Restaurants in the U.S. *Am J Prev Med* 2018;54(1):28-36.  
19  
20 13. Prentice CA, Smith C, McLean RM. Sodium in commonly consumed fast foods in New Zealand:  
21 a public health opportunity. *Public Health Nutr* 2016;19(6):958-66.  
22  
23 14. Li XQ, Wang Z, Men JH, et al. Sodium content and energy of 47 commercial dishes in four  
24 restaurants in Beijing. *Zhonghua Yu Fang Yi Xue Za Zhi* 2013;47(1):27-30.  
25  
26 15. An R. Fast-food and full-service restaurant consumption and daily energy and nutrient intakes  
27 in US adults. *Eur J Clin Nutr* 2016;70(1):97-103.  
28  
29 16. Zang J, Luo B, Wang Y, et al. Eating Out-of-Home in Adult Residents in Shanghai and the  
30 Nutritional Differences among Dining Places. *Nutrients* 2018;10(7).  
31  
32 17. Jia X, Liu J, Chen B, et al. Differences in nutrient and energy contents of commonly consumed  
33 dishes prepared in restaurants v. at home in Hunan Province, China. *Public Health Nutr*  
34 2018;21(7):1307-18.  
35  
36 18. He FJ, Zhang P, Li Y, et al. Action on Salt China. *Lancet* 2018;392(10141):7-9.  
37  
38 19. Zhang P, He FJ, Li Y, Li C, Wu J, Ma J, Zhang B, Wang H, Li Y, Han J, Luo R, He J, Li X, Liu  
39 Y, Wang C, Tan M, MacGregor GA, Li X. Action on Salt China (ASC): rationale and design  
40 (preprint). *JMIR Research Protocols* 2019.  
41  
42 20. He FJ, Zhang P, Luo R, et al. An Application-based programme to reinforce and maintain lower  
43 salt intake (AppSalt) in schoolchildren and their families in China. *BMJ Open*  
44 2019;9(7):e027793.  
45  
46 21. Xu J, Tang B, Liu M, et al. A town level comprehensive intervention study to reduce salt intake  
47 in China: protocol for a cluster randomised controlled trial. *BMJ Open* 2020;10(1):e032976.  
48  
49  
50  
51  
52  
53  
54  
55  
56  
57  
58  
59  
60

- 1  
2  
3  
4 22. Ahn SH, Kwon JS, Kim K, et al. Stages of Behavioral Change for Reducing Sodium Intake in  
5 Korean Consumers: Comparison of Characteristics Based on Social Cognitive Theory. *Nutrients*  
6 2017;9(8).  
7  
8  
9 23. Ma GX, Shive S, Zhang Y, et al. Knowledge, perceptions, and behaviors related to salt use  
10 among Philadelphia Chinese take-out restaurant owners and chefs. *Health Promot Pract*  
11 2014;15(5):638-45.  
12  
13 24. Zhang J, Sun L, Liu Y, et al. Mobile Device-Based Electronic Data Capture System Used in a  
14 Clinical Randomized Controlled Trial: Advantages and Challenges. *J Med Internet Res*  
15 2017;19(3):e66.  
16  
17 25. Zhao N, Liang B, He P, et al. A survey on the sodium content of customers' orderings at three  
18 restaurants in Beijing. *Zhonghua Liu Xing Bing Xue Za Zhi* 2014;35(4):393-6.  
19  
20  
21  
22  
23  
24  
25  
26  
27

28 Figure 1. The RIS intervention design

29  
30 Figure 2. RIS trial design  
31  
32  
33  
34  
35  
36  
37  
38  
39  
40  
41  
42  
43  
44  
45  
46  
47  
48  
49  
50  
51  
52  
53  
54  
55  
56  
57  
58  
59  
60

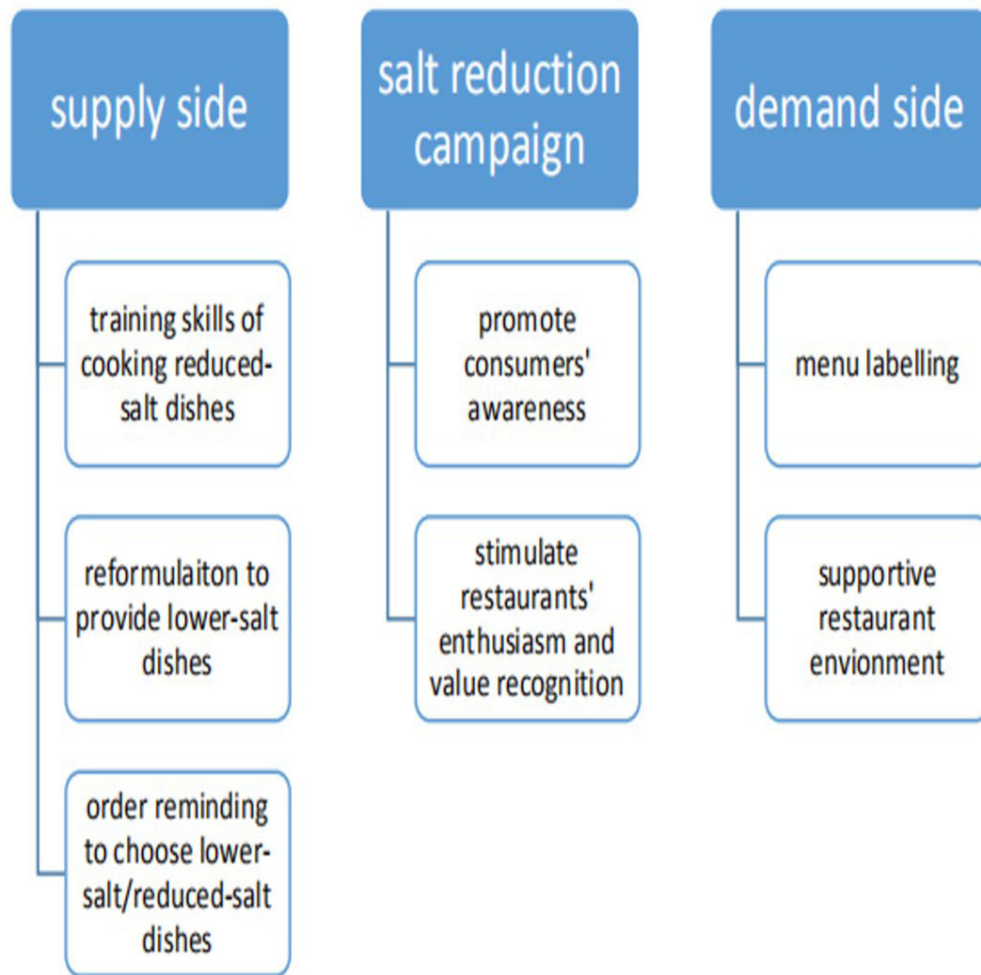

90x90mm (300 x 300 DPI)

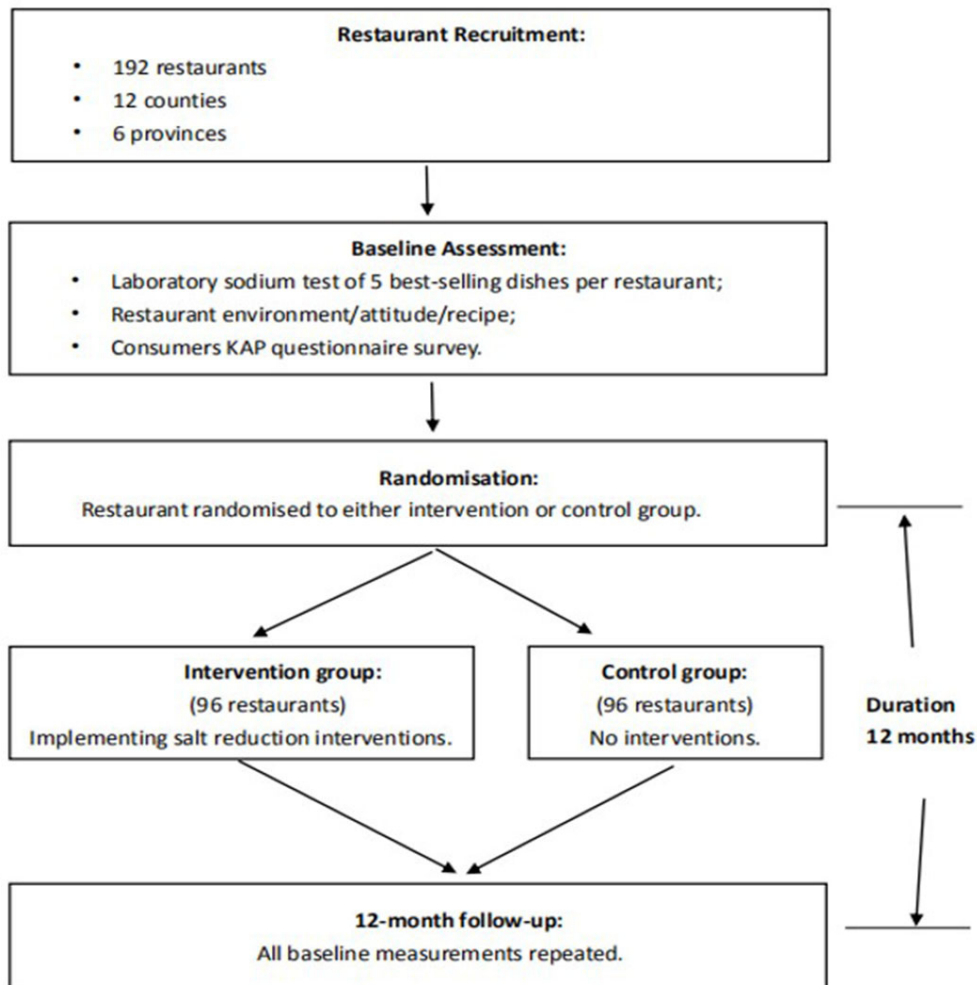

90x90mm (300 x 300 DPI)

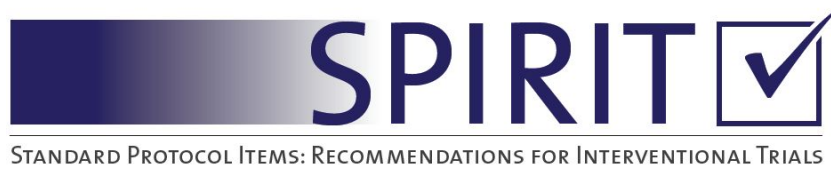

SPIRIT 2013 Checklist: Recommended items to address in a clinical trial protocol and related documents\*

| Section/item                      | Item No | Description                                                                                                                                                                                                                                                                                                                  |
|-----------------------------------|---------|------------------------------------------------------------------------------------------------------------------------------------------------------------------------------------------------------------------------------------------------------------------------------------------------------------------------------|
| <b>Administrative information</b> |         |                                                                                                                                                                                                                                                                                                                              |
| Title                             | 1       | Descriptive title identifying the study design, population, interventions, and, if applicable, trial acronym <input checked="" type="checkbox"/>                                                                                                                                                                             |
| Trial registration                | 2a      | Trial identifier and registry name. If not yet registered, name of intended registry <input checked="" type="checkbox"/>                                                                                                                                                                                                     |
|                                   | 2b      | All items from the World Health Organization Trial Registration Data Set <input checked="" type="checkbox"/>                                                                                                                                                                                                                 |
| Protocol version                  | 3       | Date and version identifier <input checked="" type="checkbox"/>                                                                                                                                                                                                                                                              |
| Funding                           | 4       | Sources and types of financial, material, and other support <input checked="" type="checkbox"/>                                                                                                                                                                                                                              |
| Roles and responsibilities        | 5a      | Names, affiliations, and roles of protocol contributors <input checked="" type="checkbox"/>                                                                                                                                                                                                                                  |
|                                   | 5b      | Name and contact information for the trial sponsor <input checked="" type="checkbox"/>                                                                                                                                                                                                                                       |
|                                   | 5c      | Role of study sponsor and funders, if any, in study design; collection, management, analysis, and interpretation of data; writing of the report; and the decision to submit the report for publication, including whether they will have ultimate authority over any of these activities <input checked="" type="checkbox"/> |
|                                   | 5d      | Composition, roles, and responsibilities of the coordinating centre, steering committee, endpoint adjudication committee, data management team, and other individuals or groups overseeing the trial, if applicable (see Item 21a for data monitoring committee) <input checked="" type="checkbox"/>                         |
| <b>Introduction</b>               |         |                                                                                                                                                                                                                                                                                                                              |
| Background and rationale          | 6a      | Description of research question and justification for undertaking the trial, including summary of relevant studies (published and unpublished) examining benefits and harms for each intervention <input checked="" type="checkbox"/>                                                                                       |
|                                   | 6b      | Explanation for choice of comparators <input checked="" type="checkbox"/>                                                                                                                                                                                                                                                    |
| Objectives                        | 7       | Specific objectives or hypotheses <input checked="" type="checkbox"/>                                                                                                                                                                                                                                                        |
| Trial design                      | 8       | Description of trial design including type of trial (eg, parallel group, crossover, factorial, single group), allocation ratio, and framework (eg, superiority, equivalence, noninferiority, exploratory) <input checked="" type="checkbox"/>                                                                                |

**Methods: Participants, interventions, and outcomes**

|                      |     |                                                                                                                                                                                                                                                                                                                                                                                                                    |
|----------------------|-----|--------------------------------------------------------------------------------------------------------------------------------------------------------------------------------------------------------------------------------------------------------------------------------------------------------------------------------------------------------------------------------------------------------------------|
| Study setting        | 9   | Description of study settings (eg, community clinic, academic hospital) and list of countries where data will be collected. Reference to where list of study sites can be obtained <input checked="" type="checkbox"/>                                                                                                                                                                                             |
| Eligibility criteria | 10  | Inclusion and exclusion criteria for participants. If applicable, eligibility criteria for study centres and individuals who will perform the interventions (eg, surgeons, psychotherapists) <input checked="" type="checkbox"/>                                                                                                                                                                                   |
| Interventions        | 11a | Interventions for each group with sufficient detail to allow replication, including how and when they will be administered <input checked="" type="checkbox"/>                                                                                                                                                                                                                                                     |
|                      | 11b | Criteria for discontinuing or modifying allocated interventions for a given trial participant (eg, drug dose change in response to harms, participant request, or improving/worsening disease) <input checked="" type="checkbox"/>                                                                                                                                                                                 |
|                      | 11c | Strategies to improve adherence to intervention protocols, and any procedures for monitoring adherence (eg, drug tablet return, laboratory tests) <input checked="" type="checkbox"/>                                                                                                                                                                                                                              |
|                      | 11d | Relevant concomitant care and interventions that are permitted or prohibited during the trial <input checked="" type="checkbox"/>                                                                                                                                                                                                                                                                                  |
| Outcomes             | 12  | Primary, secondary, and other outcomes, including the specific measurement variable (eg, systolic blood pressure), analysis metric (eg, change from baseline, final value, time to event), method of aggregation (eg, median, proportion), and time point for each outcome. Explanation of the clinical relevance of chosen efficacy and harm outcomes is strongly recommended <input checked="" type="checkbox"/> |
| Participant timeline | 13  | Time schedule of enrolment, interventions (including any run-ins and washouts), assessments, and visits for participants. A schematic diagram is highly recommended (see Figure) <input checked="" type="checkbox"/>                                                                                                                                                                                               |
| Sample size          | 14  | Estimated number of participants needed to achieve study objectives and how it was determined, including clinical and statistical assumptions supporting any sample size calculations <input checked="" type="checkbox"/>                                                                                                                                                                                          |
| Recruitment          | 15  | Strategies for achieving adequate participant enrolment to reach target sample size <input checked="" type="checkbox"/>                                                                                                                                                                                                                                                                                            |

**Methods: Assignment of interventions (for controlled trials)**

## Allocation:

|                     |     |                                                                                                                                                                                                                                                                                                                                                                                              |
|---------------------|-----|----------------------------------------------------------------------------------------------------------------------------------------------------------------------------------------------------------------------------------------------------------------------------------------------------------------------------------------------------------------------------------------------|
| Sequence generation | 16a | Method of generating the allocation sequence (eg, computer-generated random numbers), and list of any factors for stratification. To reduce predictability of a random sequence, details of any planned restriction (eg, blocking) should be provided in a separate document that is unavailable to those who enrol participants or assign interventions <input checked="" type="checkbox"/> |
|---------------------|-----|----------------------------------------------------------------------------------------------------------------------------------------------------------------------------------------------------------------------------------------------------------------------------------------------------------------------------------------------------------------------------------------------|



1  
2  
3  
4  
5  
6  
7  
8  
9  
10  
11  
12  
13  
14  
15  
16  
17  
18  
19  
20  
21  
22  
23  
24  
25  
26  
27  
28  
29  
30  
31  
32  
33  
34  
35  
36  
37  
38  
39  
40  
41  
42  
43  
44  
45  
46  
47  
48  
49  
50  
51  
52  
53  
54  
55  
56  
57  
58  
59  
60

|                                  |     |                                                                                                                                                                                                                                               |
|----------------------------------|-----|-----------------------------------------------------------------------------------------------------------------------------------------------------------------------------------------------------------------------------------------------|
| Allocation concealment mechanism | 16b | Mechanism of implementing the allocation sequence (eg, central telephone; sequentially numbered, opaque, sealed envelopes), describing any steps to conceal the sequence until interventions are assigned <input checked="" type="checkbox"/> |
| Implementation                   | 16c | Who will generate the allocation sequence, who will enrol participants, and who will assign participants to interventions <input checked="" type="checkbox"/>                                                                                 |
| Blinding (masking)               | 17a | Who will be blinded after assignment to interventions (eg, trial participants, care providers, outcome assessors, data analysts), and how <input checked="" type="checkbox"/>                                                                 |
|                                  | 17b | If blinded, circumstances under which unblinding is permissible, and procedure for revealing a participant's allocated intervention during the trial <input checked="" type="checkbox"/>                                                      |

### Methods: Data collection, management, and analysis

|                         |     |                                                                                                                                                                                                                                                                                                                                                                                                                                                  |
|-------------------------|-----|--------------------------------------------------------------------------------------------------------------------------------------------------------------------------------------------------------------------------------------------------------------------------------------------------------------------------------------------------------------------------------------------------------------------------------------------------|
| Data collection methods | 18a | Plans for assessment and collection of outcome, baseline, and other trial data, including any related processes to promote data quality (eg, duplicate measurements, training of assessors) and a description of study instruments (eg, questionnaires, laboratory tests) along with their reliability and validity, if known. Reference to where data collection forms can be found, if not in the protocol <input checked="" type="checkbox"/> |
|                         | 18b | Plans to promote participant retention and complete follow-up, including list of any outcome data to be collected for participants who discontinue or deviate from intervention protocols <input checked="" type="checkbox"/>                                                                                                                                                                                                                    |
| Data management         | 19  | Plans for data entry, coding, security, and storage, including any related processes to promote data quality (eg, double data entry; range checks for data values). Reference to where details of data management procedures can be found, if not in the protocol <input checked="" type="checkbox"/>                                                                                                                                            |
| Statistical methods     | 20a | Statistical methods for analysing primary and secondary outcomes. Reference to where other details of the statistical analysis plan can be found, if not in the protocol <input checked="" type="checkbox"/>                                                                                                                                                                                                                                     |
|                         | 20b | Methods for any additional analyses (eg, subgroup and adjusted analyses) <input checked="" type="checkbox"/>                                                                                                                                                                                                                                                                                                                                     |
|                         | 20c | Definition of analysis population relating to protocol non-adherence (eg, as randomised analysis), and any statistical methods to handle missing data (eg, multiple imputation) <input checked="" type="checkbox"/>                                                                                                                                                                                                                              |

### Methods: Monitoring

|                 |     |                                                                                                                                                                                                                                                                                                                                                                           |
|-----------------|-----|---------------------------------------------------------------------------------------------------------------------------------------------------------------------------------------------------------------------------------------------------------------------------------------------------------------------------------------------------------------------------|
| Data monitoring | 21a | Composition of data monitoring committee (DMC); summary of its role and reporting structure; statement of whether it is independent from the sponsor and competing interests; and reference to where further details about its charter can be found, if not in the protocol. Alternatively, an explanation of why a DMC is not needed <input checked="" type="checkbox"/> |
|-----------------|-----|---------------------------------------------------------------------------------------------------------------------------------------------------------------------------------------------------------------------------------------------------------------------------------------------------------------------------------------------------------------------------|

|    |          |     |                                                                                                                                                                                                                       |
|----|----------|-----|-----------------------------------------------------------------------------------------------------------------------------------------------------------------------------------------------------------------------|
| 1  |          | 21b | Description of any interim analyses and stopping guidelines, including who will have access to these interim results and make the final decision to terminate the trial <input checked="" type="checkbox"/>           |
| 2  |          |     |                                                                                                                                                                                                                       |
| 3  |          |     |                                                                                                                                                                                                                       |
| 4  |          |     |                                                                                                                                                                                                                       |
| 5  |          |     |                                                                                                                                                                                                                       |
| 6  | Harms    | 22  | Plans for collecting, assessing, reporting, and managing solicited and spontaneously reported adverse events and other unintended effects of trial interventions or trial conduct <input checked="" type="checkbox"/> |
| 7  |          |     |                                                                                                                                                                                                                       |
| 8  |          |     |                                                                                                                                                                                                                       |
| 9  |          |     |                                                                                                                                                                                                                       |
| 10 |          |     |                                                                                                                                                                                                                       |
| 11 | Auditing | 23  | Frequency and procedures for auditing trial conduct, if any, and whether the process will be independent from investigators and the sponsor <input checked="" type="checkbox"/>                                       |
| 12 |          |     |                                                                                                                                                                                                                       |
| 13 |          |     |                                                                                                                                                                                                                       |
| 14 |          |     |                                                                                                                                                                                                                       |

### Ethics and dissemination

|    |                               |     |                                                                                                                                                                                                                                                                                                                         |
|----|-------------------------------|-----|-------------------------------------------------------------------------------------------------------------------------------------------------------------------------------------------------------------------------------------------------------------------------------------------------------------------------|
| 15 |                               |     |                                                                                                                                                                                                                                                                                                                         |
| 16 |                               |     |                                                                                                                                                                                                                                                                                                                         |
| 17 | Research ethics approval      | 24  | Plans for seeking research ethics committee/institutional review board (REC/IRB) approval <input checked="" type="checkbox"/>                                                                                                                                                                                           |
| 18 |                               |     |                                                                                                                                                                                                                                                                                                                         |
| 19 |                               |     |                                                                                                                                                                                                                                                                                                                         |
| 20 |                               |     |                                                                                                                                                                                                                                                                                                                         |
| 21 | Protocol amendments           | 25  | Plans for communicating important protocol modifications (eg, changes to eligibility criteria, outcomes, analyses) to relevant parties (eg, investigators, REC/IRBs, trial participants, trial registries, journals, regulators) <input checked="" type="checkbox"/>                                                    |
| 22 |                               |     |                                                                                                                                                                                                                                                                                                                         |
| 23 |                               |     |                                                                                                                                                                                                                                                                                                                         |
| 24 |                               |     |                                                                                                                                                                                                                                                                                                                         |
| 25 |                               |     |                                                                                                                                                                                                                                                                                                                         |
| 26 | Consent or assent             | 26a | Who will obtain informed consent or assent from potential trial participants or authorised surrogates, and how (see Item 32) <input checked="" type="checkbox"/>                                                                                                                                                        |
| 27 |                               |     |                                                                                                                                                                                                                                                                                                                         |
| 28 |                               |     |                                                                                                                                                                                                                                                                                                                         |
| 29 |                               |     |                                                                                                                                                                                                                                                                                                                         |
| 30 |                               | 26b | Additional consent provisions for collection and use of participant data and biological specimens in ancillary studies, if applicable <input checked="" type="checkbox"/>                                                                                                                                               |
| 31 |                               |     |                                                                                                                                                                                                                                                                                                                         |
| 32 |                               |     |                                                                                                                                                                                                                                                                                                                         |
| 33 | Confidentiality               | 27  | How personal information about potential and enrolled participants will be collected, shared, and maintained in order to protect confidentiality before, during, and after the trial <input checked="" type="checkbox"/>                                                                                                |
| 34 |                               |     |                                                                                                                                                                                                                                                                                                                         |
| 35 |                               |     |                                                                                                                                                                                                                                                                                                                         |
| 36 |                               |     |                                                                                                                                                                                                                                                                                                                         |
| 37 | Declaration of interests      | 28  | Financial and other competing interests for principal investigators for the overall trial and each study site <input checked="" type="checkbox"/>                                                                                                                                                                       |
| 38 |                               |     |                                                                                                                                                                                                                                                                                                                         |
| 39 |                               |     |                                                                                                                                                                                                                                                                                                                         |
| 40 |                               |     |                                                                                                                                                                                                                                                                                                                         |
| 41 | Access to data                | 29  | Statement of who will have access to the final trial dataset, and disclosure of contractual agreements that limit such access for investigators <input checked="" type="checkbox"/>                                                                                                                                     |
| 42 |                               |     |                                                                                                                                                                                                                                                                                                                         |
| 43 |                               |     |                                                                                                                                                                                                                                                                                                                         |
| 44 |                               |     |                                                                                                                                                                                                                                                                                                                         |
| 45 | Ancillary and post-trial care | 30  | Provisions, if any, for ancillary and post-trial care, and for compensation to those who suffer harm from trial participation <input checked="" type="checkbox"/>                                                                                                                                                       |
| 46 |                               |     |                                                                                                                                                                                                                                                                                                                         |
| 47 |                               |     |                                                                                                                                                                                                                                                                                                                         |
| 48 | Dissemination policy          | 31a | Plans for investigators and sponsor to communicate trial results to participants, healthcare professionals, the public, and other relevant groups (eg, via publication, reporting in results databases, or other data sharing arrangements), including any publication restrictions <input checked="" type="checkbox"/> |
| 49 |                               |     |                                                                                                                                                                                                                                                                                                                         |
| 50 |                               |     |                                                                                                                                                                                                                                                                                                                         |
| 51 |                               |     |                                                                                                                                                                                                                                                                                                                         |
| 52 |                               |     |                                                                                                                                                                                                                                                                                                                         |
| 53 |                               |     |                                                                                                                                                                                                                                                                                                                         |
| 54 |                               | 31b | Authorship eligibility guidelines and any intended use of professional writers <input checked="" type="checkbox"/>                                                                                                                                                                                                      |
| 55 |                               |     |                                                                                                                                                                                                                                                                                                                         |
| 56 |                               |     |                                                                                                                                                                                                                                                                                                                         |
| 57 |                               | 31c | Plans, if any, for granting public access to the full protocol, participant-level dataset, and statistical code <input checked="" type="checkbox"/>                                                                                                                                                                     |
| 58 |                               |     |                                                                                                                                                                                                                                                                                                                         |
| 59 |                               |     |                                                                                                                                                                                                                                                                                                                         |
| 60 |                               |     |                                                                                                                                                                                                                                                                                                                         |

**Appendices**

|                            |    |                                                                                                                                                                                                |
|----------------------------|----|------------------------------------------------------------------------------------------------------------------------------------------------------------------------------------------------|
| Informed consent materials | 32 | Model consent form and other related documentation given to participants and authorised surrogates                                                                                             |
| Biological specimens       | 33 | Plans for collection, laboratory evaluation, and storage of biological specimens for genetic or molecular analysis in the current trial and for future use in ancillary studies, if applicable |

---

\*It is strongly recommended that this checklist be read in conjunction with the SPIRIT 2013 Explanation & Elaboration for important clarification on the items. Amendments to the protocol should be tracked and dated. The SPIRIT checklist is copyrighted by the SPIRIT Group under the Creative Commons "[Attribution-NonCommercial-NoDerivs 3.0 Unported](#)" license.

For peer review only

# BMJ Open

## The restaurant interventions for salt reduction in China: protocol for a randomized controlled trial

|                                 |                                                                                                                                                                                                                                                                                                                                                                                                                                                                                                                                                                                                                                                                                                                                                                                                                                                                                                                                                                                                                                                                                                                                                                                                                                                                                                                                                                                                                                                                                                               |
|---------------------------------|---------------------------------------------------------------------------------------------------------------------------------------------------------------------------------------------------------------------------------------------------------------------------------------------------------------------------------------------------------------------------------------------------------------------------------------------------------------------------------------------------------------------------------------------------------------------------------------------------------------------------------------------------------------------------------------------------------------------------------------------------------------------------------------------------------------------------------------------------------------------------------------------------------------------------------------------------------------------------------------------------------------------------------------------------------------------------------------------------------------------------------------------------------------------------------------------------------------------------------------------------------------------------------------------------------------------------------------------------------------------------------------------------------------------------------------------------------------------------------------------------------------|
| Journal:                        | <i>BMJ Open</i>                                                                                                                                                                                                                                                                                                                                                                                                                                                                                                                                                                                                                                                                                                                                                                                                                                                                                                                                                                                                                                                                                                                                                                                                                                                                                                                                                                                                                                                                                               |
| Manuscript ID                   | bmjopen-2020-038744.R2                                                                                                                                                                                                                                                                                                                                                                                                                                                                                                                                                                                                                                                                                                                                                                                                                                                                                                                                                                                                                                                                                                                                                                                                                                                                                                                                                                                                                                                                                        |
| Article Type:                   | Protocol                                                                                                                                                                                                                                                                                                                                                                                                                                                                                                                                                                                                                                                                                                                                                                                                                                                                                                                                                                                                                                                                                                                                                                                                                                                                                                                                                                                                                                                                                                      |
| Date Submitted by the Author:   | 18-Sep-2020                                                                                                                                                                                                                                                                                                                                                                                                                                                                                                                                                                                                                                                                                                                                                                                                                                                                                                                                                                                                                                                                                                                                                                                                                                                                                                                                                                                                                                                                                                   |
| Complete List of Authors:       | Du, Wenwen; Chinese Center for Disease Control and Prevention National Institute for Nutrition and Health,<br>Zhang, Jiguo; Chinese Center for Disease Control and Prevention National Institute for Nutrition and Health<br>Li, Yuan; The George Institute for Global Health at Peking University Health Science Center<br>He, Feng; Queen Mary University of London, Wolfson Institute of Preventive Medicine<br>Zhou, Xue; Heilongjiang Provincial Center for Disease Control and Prevention<br>Xu, Zhihua; Qinghai Provincial Center for Disease Control and Prevention,<br>Gao, Yifu; Hebei Provincial Center for Disease Control and Prevention<br>Yin, Lei; Hunan Provincial Center for Disease Control and Prevention<br>Chang, Xiaoyu; Sichuan Provincial Center for Disease Control and Prevention<br>Yan, Wei; Jiangxi Provincial Center for Disease Control and Prevention<br>Tan, Monique; Wolfson Institute of Preventive Medicine, Barts and The London School of Medicine & Dentistry, Queen Mary University of London, Centre for Environmental and Preventive Medicine<br>MacGregor, Graham; Queen Mary University of London, Wolfson Institute of Preventive Medicine<br>Luo, Rong; The George Institute for Global Health at Peking University Health Science Center,<br>Zhang, Puhong ; The George Institute for Global Health at Peking University Health Science Center<br>Wang, Huijun; Chinese Center for Disease Control and Prevention National Institute for Nutrition and Health |
| <b>Primary Subject Heading</b>: | Public health                                                                                                                                                                                                                                                                                                                                                                                                                                                                                                                                                                                                                                                                                                                                                                                                                                                                                                                                                                                                                                                                                                                                                                                                                                                                                                                                                                                                                                                                                                 |
| Secondary Subject Heading:      | Epidemiology, Evidence based practice, Nutrition and metabolism, Public health, Health policy                                                                                                                                                                                                                                                                                                                                                                                                                                                                                                                                                                                                                                                                                                                                                                                                                                                                                                                                                                                                                                                                                                                                                                                                                                                                                                                                                                                                                 |
| Keywords:                       | EPIDEMIOLOGY, Health policy < HEALTH SERVICES ADMINISTRATION & MANAGEMENT, NUTRITION & DIETETICS, PUBLIC HEALTH, Protocols & guidelines < HEALTH SERVICES ADMINISTRATION & MANAGEMENT                                                                                                                                                                                                                                                                                                                                                                                                                                                                                                                                                                                                                                                                                                                                                                                                                                                                                                                                                                                                                                                                                                                                                                                                                                                                                                                         |
|                                 |                                                                                                                                                                                                                                                                                                                                                                                                                                                                                                                                                                                                                                                                                                                                                                                                                                                                                                                                                                                                                                                                                                                                                                                                                                                                                                                                                                                                                                                                                                               |

1  
2  
3  
4  
5  
6  
7  
8  
9  
10  
11  
12  
13  
14  
15  
16  
17  
18  
19  
20  
21  
22  
23  
24  
25  
26  
27  
28  
29  
30  
31  
32  
33  
34  
35  
36  
37  
38  
39  
40  
41  
42  
43  
44  
45  
46  
47  
48  
49  
50  
51  
52  
53  
54  
55  
56  
57  
58  
59  
60





I, the Submitting Author has the right to grant and does grant on behalf of all authors of the Work (as defined in the below author licence), an exclusive licence and/or a non-exclusive licence for contributions from authors who are: i) UK Crown employees; ii) where BMJ has agreed a CC-BY licence shall apply, and/or iii) in accordance with the terms applicable for US Federal Government officers or employees acting as part of their official duties; on a worldwide, perpetual, irrevocable, royalty-free basis to BMJ Publishing Group Ltd ("BMJ") its licensees and where the relevant Journal is co-owned by BMJ to the co-owners of the Journal, to publish the Work in this journal and any other BMJ products and to exploit all rights, as set out in our [licence](#).

The Submitting Author accepts and understands that any supply made under these terms is made by BMJ to the Submitting Author unless you are acting as an employee on behalf of your employer or a postgraduate student of an affiliated institution which is paying any applicable article publishing charge ("APC") for Open Access articles. Where the Submitting Author wishes to make the Work available on an Open Access basis (and intends to pay the relevant APC), the terms of reuse of such Open Access shall be governed by a Creative Commons licence – details of these licences and which [Creative Commons](#) licence will apply to this Work are set out in our licence referred to above.

Other than as permitted in any relevant BMJ Author's Self Archiving Policies, I confirm this Work has not been accepted for publication elsewhere, is not being considered for publication elsewhere and does not duplicate material already published. I confirm all authors consent to publication of this Work and authorise the granting of this licence.

1  
2  
3 **The restaurant interventions for salt reduction in China: protocol for a randomized**  
4 **controlled trial**  
5

6  
7 Wenwen Du<sup>1</sup>, Jiguo Zhang<sup>1</sup>, Yuan Li<sup>2</sup>, Feng J He<sup>3</sup>, Xue Zhou<sup>4</sup>, Zhihua Xu<sup>5</sup>, Yifu Gao<sup>6</sup>, Lei Yin<sup>7</sup>,  
8  
9 Xiaoyu Chang<sup>8</sup>, Wei Yan<sup>9</sup>, Monique Tan<sup>3</sup>, Graham A MacGregor<sup>3</sup>, Rong Luo<sup>2</sup>, Puhong Zhang<sup>2</sup>,  
10  
11 Huijun Wang<sup>1</sup>  
12

13  
14  
15  
16 <sup>1</sup>The National Institute for Nutrition and Health, Chinese Center for Disease Control and Prevention,  
17  
18 Beijing, China

19  
20 <sup>2</sup>The George Institute for Global Health at Peking University Health Science Center, Beijing, China  
21

22  
23 Acknowledgements

24  
25  
26 <sup>3</sup>Wolfson Institute of Preventive Medicine, Barts and The London School of Medicine & Dentistry,  
27  
28 Queen Mary University of London, London, UK

29  
30 <sup>4</sup>Heilongjiang Provincial Center for Disease Control and Prevention, Harbin, China  
31

32  
33 <sup>5</sup>Qinghai Provincial Center for Disease Control and Prevention, Xining, China  
34

35  
36 <sup>6</sup>Hebei Provincial Center for Disease Control and Prevention, Shijiazhuang, China  
37

38  
39 <sup>7</sup>Hunan Provincial Center for Disease Control and Prevention, Changsha, China  
40

41  
42 <sup>8</sup>Sichuan Provincial Center for Disease Control and Prevention, Chengdu, China  
43

44  
45 <sup>9</sup>Jiangxi Provincial Center for Disease Control and Prevention, Nanchang, China  
46

47 **Corresponding authors**  
48

49 Puhong Zhang and Huijun Wang are joint corresponding authors.  
50

51  
52 Prof Puhong Zhang:

53  
54 zpuhong@georgeinstitute.org.cn;  
55

56  
57 Peking University Health Science Center Room 011, Unit 2, Tayuan Diplomatic Office Building  
58  
59 No. 14 Liangmahe Nan Lu, Chaoyang District, Beijing, China; and  
60

1  
2  
3  
4 Prof Huijun Wang:

5  
6 wanghj@ninh.chinacdc.cn.

7  
8  
9 29 Nanwei Rd, Xicheng District, Beijing, China.

10  
11  
12  
13 **Word count:** 3711.

14  
15  
16  
17  
18 **ABSTRACT**

19  
20  
21 **Introduction** Salt intake in China is high, and most of it comes from that added by consumers.  
22  
23 Nevertheless, recent years have seen a rapid increase in the frequency at which people eat out. The  
24  
25 aim of this study is to evaluate the effectiveness of interventions designed for salt reduction in  
26  
27 restaurants through a randomized controlled trial in China.

28  
29  
30 **Methods and analysis** As a randomized controlled trial with restaurants as study subjects, we  
31  
32 recruited 192 restaurants from 12 counties of 6 provinces in China. After the baseline survey,  
33  
34 restaurants were randomly assigned to intervention or control group. Using social cognitive theory,  
35  
36 comprehensive intervention activities were designed to encourage salt reduction in all restaurant  
37  
38 foods, and at the same time, to encourage consumers to choose lower-salt options when eating out.  
39  
40 The interventions will be conducted only in restaurants of the intervention group during the first  
41  
42 year. The follow-up assessment will be conducted at the end of the trial. The primary outcome is  
43  
44 the change in the average salt content of the 5 best-selling dishes of the restaurant, as measured by  
45  
46 laboratory tests. Secondary outcomes include differences in the monthly use of salt and salty  
47  
48 condiments between intervention and control restaurants, and the knowledge, attitude and practice  
49  
50 (KAP) on salt among restaurant consumers.

51  
52 **Ethics and dissemination** The study was reviewed and approved by the Review Board of the  
53  
54 National Institute for Nutrition and Health, China CDC, and Queen Mary Research Ethics  
55  
56 Committee. Results will be disseminated through presentations, publications and social media.

57  
58 **Trial registration number** ChiCTR1800019694



### Strengths and limitations of this study

The study develops an effective and sustainable intervention package for salt reduction in Chinese restaurant settings.

Our study covers a wide range of restaurants in China, from 6 provinces and thus representing different cuisines and eating habits.

Due to the commercial nature of restaurants, the implementation of the salt reduction interventions may be challenging, and need strong multisector support and cooperation.

### INTRODUCTION

High salt intake is one of the leading dietary risk factors for deaths and disability globally<sup>1</sup> and associated with 3 million deaths and 70 million DALYs in adults around the world. In China, high salt intake attributed to more than 0.5 million cardiometabolic deaths in 2010-12.<sup>2</sup> The most common risk of high salt intake is raised blood pressure, which alone accounted for an estimated 10.7 million deaths each year worldwide.<sup>3</sup> Statistics from the 2015 China's Report on Nutrition and Chronic Diseases revealed that the prevalence of hypertension among the Chinese population aged 18 years and older was 25.2% in 2012,<sup>4</sup> with the total number of individuals with high blood pressure reaching 270 million. International experience had proved that reducing population salt intake lowered blood pressure and reduced the risk of cardiovascular disease (CVD).<sup>5 6</sup> Salt reduction is considered one of the most cost-effective measures to improve public health.<sup>7</sup> In China, the average salt intake was 12-14g salt per day, which was more than double the WHO-recommended maximum level of 5g salt per day for adults.<sup>8 9</sup>

With the rapid urbanization and lifestyle changes in China, eating in restaurants has been becoming popular, especially in urban areas. National survey (2010-12) statistics showed that, 35.5% of the Chinese aged 6 years and older had eaten out in the past week. The proportion of people dining out was 42.2% and 28.5% in urban and rural areas respectively.<sup>4</sup> Restaurants became the second major dining location after home-cooking in China, and this had important impacts on public health and

1  
2  
3  
4 nutrition. A pilot study using a one-week salt estimation method in Beijing found that approximately  
5 40% of the salt intake was consumed outside the home.<sup>10</sup> Restaurant dishes seemed to have a high  
6 sodium content in both developed and developing countries.<sup>11-14</sup> A study showed that 46.8% of the  
7 dishes served in Chinese restaurants in Beijing contained more salt than the daily salt intake  
8 recommended by WHO.<sup>14</sup> Sodium content was substantially higher in restaurant foods than in  
9 home-made foods.<sup>15-17</sup> Therefore, to help consumers reduce their overall salt intake, it is important  
10 to develop an effective strategy to reduce the sodium content of restaurant foods.  
11  
12  
13  
14  
15  
16  
17

18 To tackle the high salt intake levels in China, Action on Salt China (ASC) was set up in 2017, funded  
19 by the UK National Institute for Health Research (NIHR). ASC aimed to implement comprehensive  
20 national salt reduction programs, with the leadership of Queen Mary University of London  
21 (QMUL), the George Institute China (TGI), Chinese Center for Disease Control and Prevention  
22 (China CDC) and other key related organizations.<sup>18</sup> The ASC team developed two national health  
23 campaigns (health education and salt reduction in packaged food) and four randomized controlled  
24 trials (RCTs) to test interventions targeting the major sources of salt intake<sup>19</sup>. The RCTs consisted  
25 of (1) an application-based intervention study in schoolchildren and their families (AIS);<sup>20</sup> (2) a  
26 home cook-based intervention study (HIS); (3) a comprehensive intervention study (CIS);<sup>21</sup> and (4)  
27 a restaurant-based intervention study (RIS), which is the one reported in the present paper.  
28  
29  
30  
31  
32  
33  
34  
35  
36  
37

38 The objective of RIS was to reduce salt use by at least 0.5g per 100g in restaurant dishes. To achieve  
39 the goal, we developed a restaurant salt reduction package, the feasibility and effectiveness of which  
40 are being tested by RIS. The key interventions were based on social cognitive theory<sup>22</sup> and included:  
41 (1) building tailored restaurant environments that encourage consumers to order lower-salt or  
42 reduced-salt dishes; (2) lower-salt or reduced-salt ordering reminders from the waiters; (3) training  
43 cooks in reduced-salt cooking; (4) salt reduction campaigns. As a part of the ASC program, this  
44 article reports on the design of the RIS intervention package and its implementation, evaluation, and  
45 current status.  
46  
47  
48  
49  
50  
51  
52  
53  
54  
55  
56

## 57 **METHODS AND ANALYSIS**

### 58 **Study setting and sampling method**

1  
2  
3  
4 To account for geographical, economic and dietary disparities, our study was carried out in 6  
5 provinces of China, which were consistent with other RCTs of ASC, covering north (Heilongjiang,  
6 Hebei, Qinghai) and south (Hunan, Sichuan and Jiangxi) China. As a RCT, the RIS baseline survey,  
7 which included the assessment of laboratory sodium level of 5 best-selling dishes, restaurant  
8 environment and attitude on salt reduction, detailed recipe information, and consumers' knowledge,  
9 attitude and practice (KAP) on salt reduction in each restaurant, was conducted in May 2019, and  
10 an evaluation survey with the same assessments will be conducted after 1-year follow-up, at the end  
11 of the trial. 192 restaurants were selected from 12 counties of the above-mentioned 6 provinces. In  
12 each province, 2 counties of similar socioeconomic level in the provincial capital city were selected.  
13 The counties that had participated in other salt-reduction projects were excluded to minimize  
14 contamination. To determine the effectiveness of the salt reduction package in restaurants of  
15 different sizes, of the 16 Chinese restaurants selected from each county, it was ensured these  
16 included 4 large restaurants, 8 medium restaurants and 4 small restaurants. The restaurants in each  
17 county were then randomly allocated to the intervention or control group after the baseline survey,  
18 using the random procedure on electronic data recording platform (EDC). The comprehensive  
19 intervention package was designed to both inspire the consumers to demand for lower salt dishes  
20 and promote the skills of reduced-salt cooking and ordering service in restaurant staff.

### 21 **Restaurant inclusion criteria and recruitment**

22  
23 Firstly, we released an open letter via local Media and cooperated with the Market Regulation  
24 Bureau to recruit restaurants which were interested in participating in the program. Then the  
25 standard inclusion criteria were used to screen for potential restaurants, including: (1) restaurants  
26 mainly offering Chinese cuisine; (2) agreeing to participate in 1 year of comprehensive salt  
27 reduction intervention and in at least two assessment surveys (baseline and follow-up surveys); (3)  
28 with complete records of salt and other condiments purchase and usage; (4) had been operating  
29 normally for more than 1 year and without plan of relocating or closing in the next 2 years; (5) with  
30 >50% of the dishes that could be prepared with less salt. Restaurants that were already involved in  
31 other salt reduction programs will be excluded. Restaurant size was determined based on surface  
32 area or number of seats (table 1). Finally, 16 restaurants in each country were selected according to  
33 the above inclusion and exclusion criteria, including 4 large-size, 8 medium-size and 4 small-size  
34  
35  
36  
37  
38  
39  
40  
41  
42  
43  
44  
45  
46  
47  
48  
49  
50  
51  
52  
53  
54  
55  
56  
57  
58  
59  
60

1  
2  
3  
4 restaurants.

5  
6 Table 1 Restaurant size classification

7

| 8 Classification     | 9 Square meters (m <sup>2</sup> ) | 10 (or) Number of seats |
|----------------------|-----------------------------------|-------------------------|
| 11 Large restaurant  | 12 >500 and ≤3000                 | 13 >250 and ≤1000       |
| 14 Medium restaurant | 15 >150 and ≤500                  | 16 >75 and ≤250         |
| 17 Small restaurant  | 18 ≤150                           | 19 ≤75                  |

20  
21

22 **Randomization**

23  
24 After baseline assessment, restaurants were randomly allocated to either the control group or the  
25 intervention group (96 restaurants in each group). The randomization was stratified by the size of  
26 restaurants and carried out using computer generated random numbers by a statistician who was not  
27 involved in the study and blind to the identity of the restaurants. Following the baseline survey, the  
28 restaurants allocated to the intervention group implemented a series of salt reduction activities.  
29  
30 Meanwhile, the control restaurants operated as usual.  
31  
32  
33  
34  
35  
36  
37  
38  
39

40 **Intervention**

41  
42 The objective of RIS was to reduce salt use in restaurants. We aimed to achieve not only short-term,  
43 but also sustainable long-term effects. Social cognitive theory proposes behavior was influenced by  
44 the constant interaction of personal factors (ie. skills, knowledge) and environmental factors (ie.  
45 appropriate modeling for learning, available materials)<sup>22</sup>. Therefore, we designed the intervention  
46 activities based on both the supply (restaurant) and demand (consumer) sides (Figure 1). For the  
47 intervention group, the RIS intervention package included the following activities:  
48  
49  
50  
51  
52  
53  
54  
55  
56  
57

58 Figure 1 The RIS intervention design

59  
60 (1) Menu labelling:

1  
2  
3  
4 In the baseline survey, we collected the detailed ingredients composition, including the amount of  
5 salt and condiments, of the 50 best-selling dishes of each restaurant. If a restaurant offers fewer than  
6 50 dishes, information on all available dishes were collected. In each restaurant, the 10% of the  
7 dishes that had the lowest sodium content (according to baseline survey) were labelled “lower salt”  
8 on the menu, thus providing clear information to the customers. This menu will be used in the  
9 intervention restaurants throughout the 1- year trial period.  
10  
11  
12  
13  
14

15  
16 (2) Training for chef and waiter/waitress:  
17

18 In close collaboration with culinary experts, we developed a series of training materials, including  
19 manual and videos, to guide chefs and waiters/waitresses in encouraging salt reduction services in  
20 their routine work. Besides, we organized the service of a professional team to offer face-to-face  
21 training for the restaurant staff of each county at least once a year. At least 3 representatives per  
22 restaurant were required to attend the training. This training mainly focused on the following  
23 aspects: “salt sources in restaurant dishes”, “why reduce salt”, “practical skills in reducing salt for  
24 restaurant cooking”, “building a reduced-salt environment in a restaurant” and “service and  
25 communication skills”. Local county investigators were responsible to enhance the knowledge and  
26 skills among staff in each intervention restaurant by conducting monthly follow-up supervisions.  
27  
28  
29  
30  
31  
32  
33  
34  
35  
36

37 During the trial, each intervention restaurant was encouraged to reduce salt usage by 10% in all  
38 dishes, and greater reductions according to the customers’ request (such as, -30% or -50% salt).  
39 Furthermore, at least 3 lower-salt dishes (sodium  $\leq$  100mg/100g) per restaurant should be developed  
40 through reformulation to provide customers more options of lower-salt dishes. Waiters/waitresses  
41 were required to recommend customers the lower-salt dishes, as well as remind them they can  
42 choose the reduced-salt option with almost all the other dishes.  
43  
44  
45  
46  
47  
48

49 (3) Supportive environment for salt reduction in restaurants:  
50

51 Information that refers to salt reduction, salt and health, and available reduced-salt dishes were  
52 shown through videos, posters, brochures, leaflets, and table displays to build restaurant  
53 environments that makes it easier for the customers to choose lower-salt options. For example,  
54 messages with announcement “-30%/-50% salt options were available for most dishes” will be  
55 posted on dining tables. These materials should be displayed at noticeable positions in the  
56  
57  
58  
59  
60

1  
2  
3  
4 intervention restaurants during the trial period.

5  
6 (4) Salt reduction campaign:

7  
8  
9 To create a social environment supportive of salt reduction, local investigators were encouraged to  
10 organize a campaign at least once during the 1-year trial, with the theme of “less salt, healthy  
11 eating”, to help raise consumers’ awareness of salt reduction when they eat out. Another import aim  
12 was to encourage restaurants to pay more attention to reducing salt and offering lower-salt dishes.  
13 To expand the reach of the campaign, news agencies and social media were used to disseminate the  
14 campaign messages. To limit contamination to control group, the salt reduction campaign should  
15 only involve the restaurants in intervention group.  
16  
17  
18  
19  
20  
21  
22

23 Certified medals of “ASC Salt Reducing Restaurant” were granted to intervention restaurants,  
24 according to the standardized requirements. The medal will help motivate restaurants for salt  
25 reduction and value their efforts.  
26  
27  
28  
29  
30  
31  
32

33 **Sample size**

34  
35 In the current randomized controlled trial, selected restaurants were the study subjects. Based on the  
36 results of a study on Chinese restaurants,<sup>23</sup> we assumed a standard deviation (SD) of 1g/100g of  
37 dish for the sodium content of Chinese restaurant dishes, and expected that a sample of 192  
38 restaurants would achieve 80% power (with two-sided alpha=0.05) to detect a change in salt content  
39 by 0.5 g/100g dish for the 5 best-selling dishes in each restaurant, allowing for a 20% dropping rate  
40 of restaurants. Therefore, a total of 192 restaurants were recruited into the study.  
41  
42  
43  
44  
45  
46  
47  
48  
49

50 **Outcome measures**

51  
52 (1) Effectiveness outcomes:

53  
54  
55 The primary outcome was the differences between the intervention and control groups in the change  
56 of the sodium content of the 5 best-selling dishes from baseline to the end of the trial (Figure 2).  
57

58  
59 Secondary outcomes included the differences between the intervention and control groups in: (1)  
60

1  
2  
3  
4 monthly use of salt and main salty condiments by the restaurant chefs; (2) salt-related knowledge,  
5 attitude and practice (KAP) in restaurant customers.  
6  
7  
8  
9

10  
11 Figure 2 RIS trial design  
12

13 (2) Feasibility outcomes:  
14

15  
16 The feasibility outcomes included two dimensions: 1) the cost-benefit values, and 2) the fidelity and  
17 adoption of the interventions (frequency, coverage and satisfaction), as well as the barriers and  
18 facilitators of conducting the interventions.  
19  
20

### 21 22 **Outcome assessments** 23

24  
25 (1) Effectiveness outcome assessments:  
26

27  
28 The primary and secondary effectiveness outcomes should be assessed before and after the 1-year  
29 intervention, in both intervention and control restaurants.  
30

31  
32 For the primary outcome, we collected the whole portion of the 5 best-selling dishes of each  
33 restaurant at baseline and follow-up, to test their sodium content using laboratory flame atomic  
34 absorption spectrometry method. Although it would be possible to estimate the sodium content of a  
35 dish by asking the chefs what ingredients and condiments they have used, this would rely on the  
36 chefs' memory. By using laboratory tests, we ensured the accurate assessment of the sodium content  
37 of the dishes. The dishes chosen for laboratory test should be top-selling firstly, and then involve  
38 different types according to the ingredients (ie. animal food based dishes, mixed food dishes, and  
39 vegetable food based dishes). The local researchers went to each restaurant and bought the 5 best-  
40 selling dishes anonymously in order to avoid introducing bias. The whole dishes, including sauce  
41 and soup when appropriate, were weighed and photographed. Once cooled off, they were transferred  
42 to a sampling bag. The samples were stored at -20°C freezers until transferred to the laboratory.  
43  
44 Theoretically, for each restaurant, the same dishes bought at a similar date of the year should be  
45 assessed at baseline and follow-up assessment. However, if the dishes collected at baseline are no  
46 longer sold at the follow-up assessment, comparable dishes with similar ingredients and cooking  
47  
48  
49  
50  
51  
52  
53  
54  
55  
56  
57  
58  
59  
60

1  
2  
3  
4 method could be chosen as alternatives.  
5

6 For the secondary outcomes, questionnaires were administered by trained local investigators  
7 through a mobile EDC app developed for RIS. Compared to traditional data collection methods, the  
8 mobile EDC had advantages in terms of process and quality control, as demonstrated in a previous  
9 clinical trial<sup>24</sup>. There were two questionnaires in the survey, including restaurant assessment and  
10 consumer survey. The questions related to the restaurant assessment consisted of: (1) basic  
11 information about the restaurant; (2) salt reduction environment and services in restaurant; (3)  
12 monthly salt and salty condiments usage; (4) attitude and challenges related to reducing salt in  
13 restaurant; (5) dishes ( $\leq 50$  dishes/restaurant) recipe (all ingredients and condiments used, and in  
14 what quantity) and cooking method. The restaurant-related questions were asked to the  
15 owners/managers who directly manage the restaurant, and the recipes were collected by face-to-  
16 face interview with chefs who were familiar with preparing those dishes. To assist chefs in  
17 remembering accurately the amount of ingredients used in the dishes, the investigators could show  
18 them the weighed amount using a usual spoon or other measuring instruments used in their  
19 restaurants.  
20  
21  
22  
23  
24  
25  
26  
27  
28  
29  
30  
31  
32  
33

34 For the consumer survey, we randomly selected 20 customers (10 males and 10 females) in all  
35 intervention and control restaurants, before and after the trial, to assess the changes and differences  
36 of knowledge, attitudes, and behaviours related to salt reduction.  
37  
38  
39

#### 40 (2) Feasibility outcome assessments: 41

42  
43 Economic evaluation will be conducted from the health sector perspective to compare the  
44 comprehensive intervention package for restaurant on salt reduction versus business as usual, and it  
45 will include two dimensions: a trial-based economic evaluation, and a modelled economic  
46 evaluation of long-term costs and outcomes. Intervention costs will include the direct costs of  
47 running the program, excluding any research and development costs. We will consider restaurant  
48 dishes consumption at the population level for the economic evaluation. Therefore, the trial-based  
49 economic evaluation will be assessed in terms of incremental cost per unit salt reduction in  
50 restaurant dishes and systolic blood pressure (BP). The conversion of sodium in restaurant dishes to  
51 daily sodium intake for the population, and its relationship with systolic BP, will be based on the  
52  
53  
54  
55  
56  
57  
58  
59  
60



1  
2  
3  
4 scientific literature and other population trials under the ASC project. The modelled economic  
5  
6 evaluation will examine the cost, survival, health states (including death and CVD events) to  
7  
8 estimate incremental cost per life year saved and cost per quality-adjusted life year gained. The  
9  
10 transition probabilities across health states and costs attached to different health states, and the long-  
11  
12 term effects of reduction in sodium intake will be based on literature data. Sensitivity analyses will  
13  
14 be used to estimate uncertainty about the primary findings associated with various key  
15  
16 parameters. The process evaluation will help us assess the fidelity and adoption of key components  
17  
18 of intervention (frequency, coverage and satisfaction), and understand the barriers and facilitators  
19  
20 of the intervention. The evaluation will be conducted using mixed-methods during and at the end of  
21  
22 the trial, from monthly supervision records, structured process evaluation form, and in-depth  
23  
24 interviews with restaurant staff and customers. Designed forms, including sales form of lower-salt  
25  
26 labeling dishes, recipe information form of reduced-salt dishes, and consumer feedback cards will  
27  
28 be collected at three time points during the intervention period, in order to monitor the acceptance  
29  
30 and the effect of the RIS intervention.

### 31 **Data collection, management and analysis**

#### 32 **Data collection**

33  
34  
35 We used the specially designed mobile EDC to collect assessments data during the RIS program, as  
36  
37 well as monthly supervision records in the 1-year comprehensive intervention. The local CDCs were  
38  
39 responsible for data collection. The structure of data collection system consisted of 192 restaurants.  
40  
41 The local researchers logged in the system, input the assessment data and supervision records in  
42  
43 each restaurant page. The assessment data included: (1) information on restaurants' salt reduction-  
44  
45 related environment, service, attitude, challenges, and monthly salt usage, as well as some sales  
46  
47 data; (2) information on recipe, cooking method, and laboratory sodium content; (3) information on  
48  
49 customer knowledge, attitude, and behaviors related to salt reduction. To collect the primary  
50  
51 indicator-laboratory measured sodium contents of the best-selling dishes, the local investigators  
52  
53 went to each restaurant and buy the 5 best-selling dishes anonymously, then put them totally into  
54  
55 the sampling bags, weighed the amount, stored at -20°C in refrigerator, and finally transferred to  
56  
57 the designated laboratory for sodium test. Monthly supervision records included information on the  
58  
59  
60

1  
2  
3  
4 process of intervention activities, and any reason for not carrying them out, as well as photos that  
5  
6 could inform on the intervention status.  
7

### 8 **Data management**

9  
10 The mobile EDC used in the RIS program was developed by the Beijing University of Aeronautics  
11 and Astronautics. The security of data management was demonstrated in another publication under  
12 the same ASC project<sup>20</sup>. To ensure the data validation and detection of keying errors, the EDC  
13 system set rules of logic jump for associated questions, and abnormal values recognition. To  
14 guarantee the integrity and authenticity of data collection, local researchers were given different  
15 level of authority according to their roles. For example, the local investigators were responsible for  
16 inputting survey and supervision data, but could not delete the records they added. The inspectors  
17 had authority to check the data accuracy, delete mistaken records, start and close discussion about  
18 doubtful data, but cannot add new records. The person in charge at county, provincial and national  
19 levels, could view the data of all restaurants under their management, but could not make any  
20 changes. All modifications were clearly recorded in the EDC system.  
21  
22  
23  
24  
25  
26  
27  
28  
29  
30  
31  
32

### 33 **Statistical analysis**

34  
35 The effect of the intervention package for restaurants on the primary or secondary outcomes will be  
36 determined using linear mixed models. The differential change by groups from baseline to the end  
37 of follow-up will be indicated by including group (intervention, control), time (baseline, follow-up),  
38 and the interaction of group\*time, with adjustments for potential confounding variables (area,  
39 restaurant size, cooking method and dish category). We will consider sensitivity analyses to examine  
40 the robustness of the conclusion of the primary analysis. Results will be described as mean, SD,  
41 standard error (SE), and 95% confidence interval where appropriate. SAS 9.4 will be used for the  
42 data cleaning and statistical analyses. All analyses will be two sided, and  $P < 0.05$  will be considered  
43 significant.  
44  
45  
46  
47  
48  
49  
50  
51  
52  
53  
54  
55

### 56 **Project status and timelines**

57  
58 The recruitment of restaurants started in April 2019. Baseline survey was conducted between May  
59  
60

1  
2  
3  
4 and June 2019. 192 restaurants from 12 counties completed the assessments, with data of 976  
5 laboratory-tested dishes, 8145 recipes, and 3840 customers. Theoretically, the follow-up survey will  
6 be conducted in the middle 2020, after 12 months' intervention. Due to the pandemic of novel  
7 coronavirus disease (COVID-19) in early 2020, restaurants were temporarily closed in all the  
8 provinces of China. According to the feedback from the 12 counties, all of restaurants in our study  
9 were closed from late January to early April.  
10 We will evaluate influences of the COVID-19 pandemic on restaurants, especially on those in the  
11 intervention group, and decide on whether to postpone the follow-up assessment and other issues.  
12  
13  
14  
15  
16  
17  
18  
19

### 20 **Expected outcome and potential impact**

21  
22 Unlike the standardized menus found in western fast food chains, Chinese dishes vary considerably  
23 by areas, restaurants, and chefs, even for dishes with the same name. Few studies existed on the  
24 sodium content of restaurant dishes in China.<sup>14 25</sup> The current study covered a wide range of  
25 restaurants in 6 provinces, could provide the evidence on the sodium level and sources in Chinese  
26 restaurants, which will be very helpful to develop the specific intervention measures. The study  
27 aimed to explore a feasible, effective and sustainable approach to achieve salt reduction for Chinese  
28 restaurants. With an increasing proportion of people eating out, restaurant dishes contributed much  
29 more sodium than decades before and induced more health risks. Compared with salt reduction  
30 initiatives in individuals, communities or schools, those conducted in restaurants may face more  
31 challenges. With this study, we will identify barriers and facilitators for implementation, as well as  
32 solutions suitable to Chinese restaurants to reduce salt. Based on these findings, we will be able to  
33 draw important public health implications.  
34  
35  
36  
37  
38  
39  
40  
41  
42  
43  
44  
45  
46

### 47 **Patient and public involvement**

48  
49 Using information on the current situation of Chinese restaurants, inclusion criteria were determined  
50 before the recruitment. An open letter was disseminated via local media, introducing the RIS project  
51 and calling for participation publicly. Local CDC investigators, with support from the  
52 Administration for Market Regulation, made various mobilization efforts to help restaurant owners  
53 understand the purpose of the project and the information to be collected in the investigation. With  
54 the consent of selected restaurants, we conducted assessment surveys and implemented the  
55  
56  
57  
58  
59  
60

1  
2  
3  
4 intervention. At the end of the study, we will disseminate the results to the restaurants, and discuss  
5  
6 with related stakeholders how to translate the research findings into practice and develop a public  
7  
8 health strategy.  
9

## 10 **ETHICS AND DISSEMINATION**

11  
12 According to the results of ethics review by the Review Board of the National Institute for Nutrition  
13  
14 and Health, China CDC, and Queen Mary Research Ethics Committee, written informed consent  
15  
16 from restaurants and consumers were exempted from the RIS project. However, the investigators  
17  
18 should fully inform the selected restaurants and consumers of the purpose and activities of the  
19  
20 project, strive for understanding and cooperation, and keep the information confidential. The  
21  
22 restaurants and consumers will be free to discontinue their participation at any time without giving  
23  
24 any reasons.  
25

26  
27 The findings of this research will be disseminated through conference presentations, peer-reviewed  
28  
29 publications, press release and social media.  
30

### 31 **Author affiliations**

32  
33  
34 <sup>1</sup>The National Institute for Nutrition and Health, Chinese Center for Disease Control and Prevention,  
35  
36 Beijing, China  
37

38  
39 <sup>2</sup>The George Institute for Global Health at Peking University Health Science Center, Beijing, China  
40

### 41 **Acknowledgements**

42  
43  
44 <sup>3</sup>Wolfson Institute of Preventive Medicine, Barts and The London School of Medicine & Dentistry,  
45  
46 Queen Mary University of London, London, UK  
47

48  
49 <sup>4</sup>Heilongjiang Provincial Center for Disease Control and Prevention, Harbin, China  
50

51  
52 <sup>5</sup>Qinghai Provincial Center for Disease Control and Prevention, Xining, China  
53

54  
55 <sup>6</sup>Hebei Provincial Center for Disease Control and Prevention, Shijiazhuang, China  
56

57  
58 <sup>7</sup>Hunan Provincial Center for Disease Control and Prevention, Changsha, China  
59

60  
<sup>8</sup>Sichuan Provincial Center for Disease Control and Prevention, Chengdu, China

1  
2  
3  
4 <sup>9</sup>Jiangxi Provincial Center for Disease Control and Prevention, Nanchang, China  
5

6 **Acknowledgements** The authors would like to thank the restaurant managers, chefs and servicers,  
7  
8 consumers, local administration for market regulation, experts of Sichuan Tourism University for  
9  
10 their opinions on the development of the intervention program.  
11

12  
13 **Contributors** PZ and FJH conceived the project. WD, JZ, HW, YL, FJH and PZ participated in  
14  
15 study design and implementation. WD, JZ, HW, YL, PZ, FJH, XZ, ZX, YG, LY, XC and WY  
16  
17 facilitates restaurant and public involvement and were responsible for setting up the study in each  
18  
19 site. All authors contributed to the development of intervention and evaluation. WD wrote the first  
20  
21 draft of the manuscript, and JZ, HW, YL, PZ, FJH, MT, GAM and RL revised the draft. All authors  
22  
23 contributed to the refinement of the study protocol and approved the final manuscript.  
24

25 **Funding** This work is supported by the National Institute for Health Research (NIHR, NIHR Global  
26  
27 Health Research Unit Action on Salt China at Queen Mary University of London) using Official  
28  
29 Development Assistance (ODA) funding (16/136/77). The views expressed in this publication are  
30  
31 those of the author(s) and not necessarily those of the NIHR or the Department of Health and Social  
32  
33 Care.  
34

35 **Disclaimer** The findings of this study will be disseminated through discussions or presentations at  
36  
37 conferences, peer-reviewed publications and general media.  
38

39  
40 **Competing interests** FJH is a member of the Consensus Action on Salt & Health (CASH), a non-  
41  
42 profit charitable organization, and its international branch World Action on Salt & Health (WASH).  
43  
44 FJH does not receive any financial support from CASH or WASH. GAM is the chairman of Blood  
45  
46 Pressure UK (BPUK), chairman of CASH and chairman of WASH and does not receive any  
47  
48 financial support from any of these organizations. BPUK, CASH and WASH are non-profit  
49  
50 charitable organizations. All other authors have no competing interests to declare.  
51

52 **Patient consent for publication** Not required.  
53

54  
55 **Ethics approval** The study has been reviewed and approved by the Review Board of the National  
56  
57 Institute for Nutrition and Health, China CDC (20180314), and Queen Mary Research Ethics  
58  
59 Committee (QMERC2018/14).  
60

1  
2  
3  
4 **Provenance and peer review** Not mentioned; externally peer reviewed.  
5

6 **Open access** This is an open access article distributed in accordance with the Creative Commons  
7 Attribution Non Commercial (CC BY-NC 4.0) license, which permits others to distribute, remix,  
8 adapt, build upon this work non-commercially, and license their derivative works on different terms,  
9 provided the original work is properly cited, appropriate credit is given, any changes made indicated  
10 and the use is non-commercial. See: <http://creativecommons.org/licenses/by-nc/4.0/>.  
11  
12  
13  
14  
15  
16  
17  
18

## 19 REFERENCES

- 20  
21  
22 1. Collaborators GBDD. Health effects of dietary risks in 195 countries, 1990-2017: a systematic  
23 analysis for the Global Burden of Disease Study 2017. *Lancet* 2019;393(10184):1958-72.  
24  
25
- 26 2. He Y, Li Y, Yang X, et al. The dietary transition and its association with cardiometabolic  
27 mortality among Chinese adults, 1982-2012: a cross-sectional population-based study. *Lancet*  
28 *Diabetes Endocrinol* 2019;7(7):540-48.  
29  
30
- 31 3. Forouzanfar MH, Liu P, Roth GA, et al. Global Burden of Hypertension and Systolic Blood  
32 Pressure of at Least 110 to 115 mm Hg, 1990-2015. *JAMA* 2017;317(2):165-82.  
33  
34
- 35 4. Bureau of National Health and Family Planning Commission Disease Prevention and Control.  
36 Report on Chinese Residents' Chronic Diseases and Nutrition. Beijing: *People's Medical*  
37 *Publishing House*, 2015.  
38  
39
- 40 5. Aburto NJ, Ziolkovska A, Hooper L, et al. Effect of lower sodium intake on health: systematic  
41 review and meta-analyses. *BMJ* 2013;346:f1326.  
42  
43
- 44 6. He FJ, Li J, Macgregor GA. Effect of longer term modest salt reduction on blood pressure:  
45 Cochrane systematic review and meta-analysis of randomised trials. *BMJ* 2013;346:f1325.  
46  
47
- 48 7. Asaria P, Chisholm D, Mathers C, et al. Chronic disease prevention: health effects and financial  
49 costs of strategies to reduce salt intake and control tobacco use. *Lancet* 2007;370(9604):2044-53.  
50  
51
- 52 8. Anderson CA, Appel LJ, Okuda N, et al. Dietary sources of sodium in China, Japan, the United  
53 Kingdom, and the United States, women and men aged 40 to 59 years: the INTERMAP study. *J*  
54  
55  
56  
57  
58  
59  
60

- 1  
2  
3  
4 *Am Diet Assoc* 2010;110(5):736-45.
- 5  
6 9. He FJ, Wu Y, Feng XX, et al. School based education programme to reduce salt intake in children  
7 and their families (School-EduSalt): cluster randomised controlled trial. *BMJ* 2015;350:h770.  
8  
9  
10  
11 10. Zhao F, Zhang P, Zhang L, et al. Consumption and sources of dietary salt in family members in  
12 Beijing. *Nutrients* 2015;7(4):2719-30.  
13  
14  
15 11. Ahuja JK, Wasswa-Kintu S, Haytowitz DB, et al. Sodium content of popular commercially  
16 processed and restaurant foods in the United States. *Prev Med Rep* 2015;2:962-7.  
17  
18  
19 12. Wolfson JA, Moran AJ, Jarlenski MP, et al. Trends in Sodium Content of Menu Items in Large  
20 Chain Restaurants in the U.S. *Am J Prev Med* 2018;54(1):28-36.  
21  
22  
23 13. Prentice CA, Smith C, McLean RM. Sodium in commonly consumed fast foods in New Zealand:  
24 a public health opportunity. *Public Health Nutr* 2016;19(6):958-66.  
25  
26  
27 14. Li XQ, Wang Z, Men JH, et al. Sodium content and energy of 47 commercial dishes in four  
28 restaurants in Beijing. *Zhonghua Yu Fang Yi Xue Za Zhi* 2013;47(1):27-30.  
29  
30  
31 15. An R. Fast-food and full-service restaurant consumption and daily energy and nutrient intakes  
32 in US adults. *Eur J Clin Nutr* 2016;70(1):97-103.  
33  
34  
35 16. Zang J, Luo B, Wang Y, et al. Eating Out-of-Home in Adult Residents in Shanghai and the  
36 Nutritional Differences among Dining Places. *Nutrients* 2018;10(7).  
37  
38  
39 17. Jia X, Liu J, Chen B, et al. Differences in nutrient and energy contents of commonly consumed  
40 dishes prepared in restaurants v. at home in Hunan Province, China. *Public Health Nutr*  
41 2018;21(7):1307-18.  
42  
43  
44 18. He FJ, Zhang P, Li Y, et al. Action on Salt China. *Lancet* 2018;392(10141):7-9.  
45  
46  
47 19. Zhang P, He FJ, Li Y, Li C, Wu J, Ma J, Zhang B, Wang H, Li Y, Han J, Luo R, He J, Li X, Liu  
48 Y, Wang C, Tan M, MacGregor GA, Li X. Action on Salt China (ASC): rationale and design  
49 (preprint). *JMIR Research Protocols* 2019.  
50  
51  
52 20. He FJ, Zhang P, Luo R, et al. An Application-based programme to reinforce and maintain lower  
53  
54  
55  
56  
57  
58  
59  
60

1  
2  
3 salt intake (AppSalt) in schoolchildren and their families in China. *BMJ Open*  
4 2019;9(7):e027793.  
5  
6

7  
8 21. Xu J, Tang B, Liu M, et al. A town level comprehensive intervention study to reduce salt intake  
9 in China: protocol for a cluster randomised controlled trial. *BMJ Open* 2020;10(1):e032976.  
10  
11

12 22. Ahn SH, Kwon JS, Kim K, et al. Stages of Behavioral Change for Reducing Sodium Intake in  
13 Korean Consumers: Comparison of Characteristics Based on Social Cognitive Theory. *Nutrients*  
14 2017;9(8).  
15  
16  
17

18 23. Ma GX, Shive S, Zhang Y, et al. Knowledge, perceptions, and behaviors related to salt use  
19 among Philadelphia Chinese take-out restaurant owners and chefs. *Health Promot Pract*  
20 2014;15(5):638-45.  
21  
22  
23  
24

25 24. Zhang J, Sun L, Liu Y, et al. Mobile Device-Based Electronic Data Capture System Used in a  
26 Clinical Randomized Controlled Trial: Advantages and Challenges. *J Med Internet Res*  
27 2017;19(3):e66.  
28  
29  
30  
31

32 25. Zhao N, Liang B, He P, et al. A survey on the sodium content of customers' orderings at three  
33 restaurants in Beijing. *Zhonghua Liu Xing Bing Xue Za Zhi* 2014;35(4):393-6.  
34  
35  
36  
37  
38  
39  
40

41 Figure 1. The RIS intervention design  
42  
43  
44

45 Figure 2. RIS trial design  
46  
47  
48  
49  
50  
51  
52  
53  
54  
55  
56  
57  
58  
59  
60



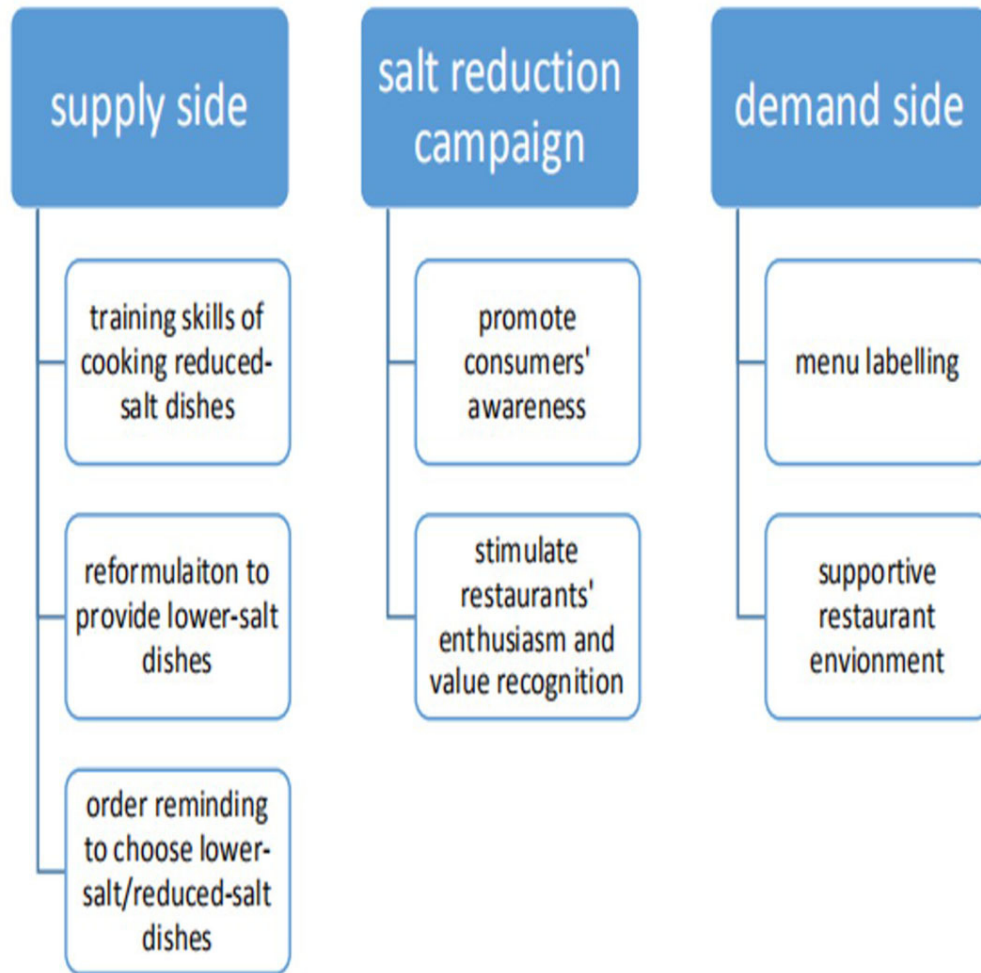

The RIS intervention design

90x90mm (300 x 300 DPI)

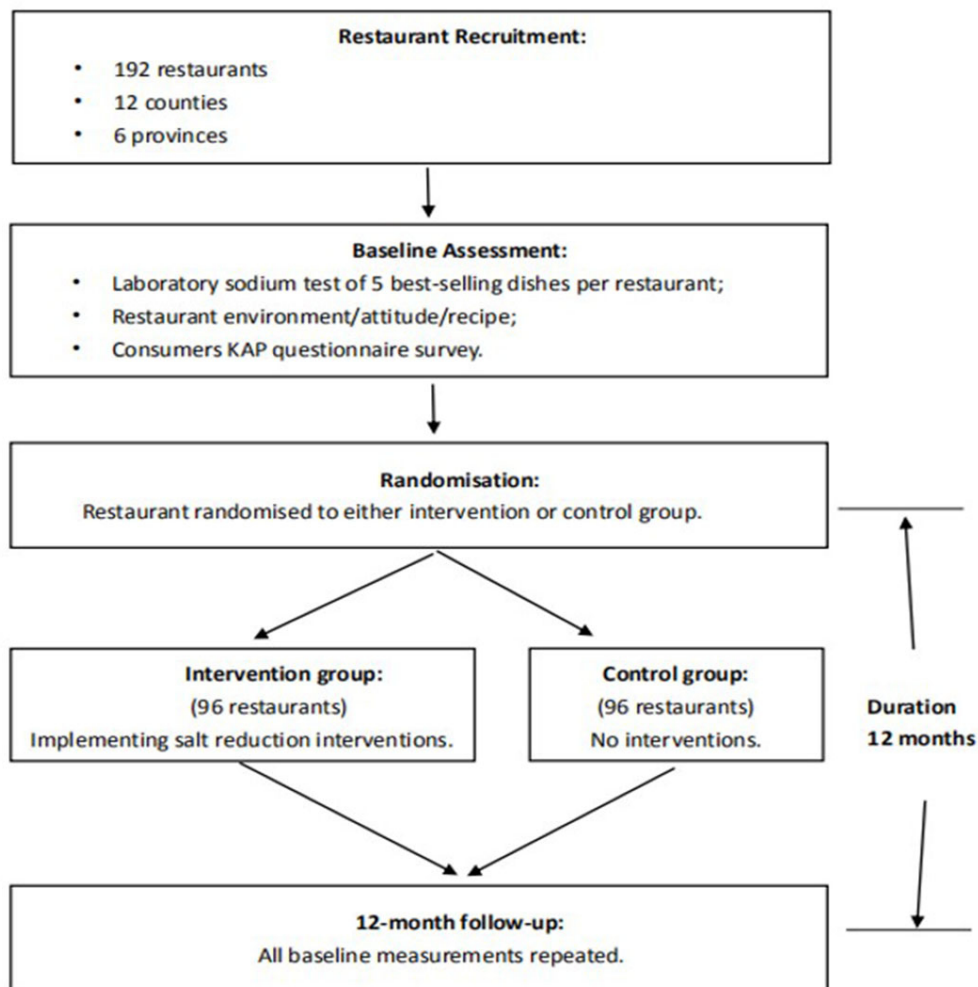

RIS trial design

90x90mm (300 x 300 DPI)

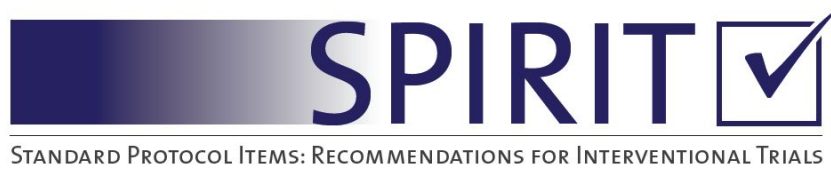

SPIRIT 2013 Checklist: Recommended items to address in a clinical trial protocol and related documents\*

| Section/item                      | Item No | Description                                                                                                                                                                                                                                                                                                                  |
|-----------------------------------|---------|------------------------------------------------------------------------------------------------------------------------------------------------------------------------------------------------------------------------------------------------------------------------------------------------------------------------------|
| <b>Administrative information</b> |         |                                                                                                                                                                                                                                                                                                                              |
| Title                             | 1       | Descriptive title identifying the study design, population, interventions, and, if applicable, trial acronym <input checked="" type="checkbox"/>                                                                                                                                                                             |
| Trial registration                | 2a      | Trial identifier and registry name. If not yet registered, name of intended registry <input checked="" type="checkbox"/>                                                                                                                                                                                                     |
|                                   | 2b      | All items from the World Health Organization Trial Registration Data Set <input checked="" type="checkbox"/>                                                                                                                                                                                                                 |
| Protocol version                  | 3       | Date and version identifier <input checked="" type="checkbox"/>                                                                                                                                                                                                                                                              |
| Funding                           | 4       | Sources and types of financial, material, and other support <input checked="" type="checkbox"/>                                                                                                                                                                                                                              |
| Roles and responsibilities        | 5a      | Names, affiliations, and roles of protocol contributors <input checked="" type="checkbox"/>                                                                                                                                                                                                                                  |
|                                   | 5b      | Name and contact information for the trial sponsor <input checked="" type="checkbox"/>                                                                                                                                                                                                                                       |
|                                   | 5c      | Role of study sponsor and funders, if any, in study design; collection, management, analysis, and interpretation of data; writing of the report; and the decision to submit the report for publication, including whether they will have ultimate authority over any of these activities <input checked="" type="checkbox"/> |
|                                   | 5d      | Composition, roles, and responsibilities of the coordinating centre, steering committee, endpoint adjudication committee, data management team, and other individuals or groups overseeing the trial, if applicable (see Item 21a for data monitoring committee) <input checked="" type="checkbox"/>                         |
| <b>Introduction</b>               |         |                                                                                                                                                                                                                                                                                                                              |
| Background and rationale          | 6a      | Description of research question and justification for undertaking the trial, including summary of relevant studies (published and unpublished) examining benefits and harms for each intervention <input checked="" type="checkbox"/>                                                                                       |
|                                   | 6b      | Explanation for choice of comparators <input checked="" type="checkbox"/>                                                                                                                                                                                                                                                    |
| Objectives                        | 7       | Specific objectives or hypotheses <input checked="" type="checkbox"/>                                                                                                                                                                                                                                                        |
| Trial design                      | 8       | Description of trial design including type of trial (eg, parallel group, crossover, factorial, single group), allocation ratio, and framework (eg, superiority, equivalence, noninferiority, exploratory) <input checked="" type="checkbox"/>                                                                                |

**Methods: Participants, interventions, and outcomes**

|                      |     |                                                                                                                                                                                                                                                                                                                                                                                                                    |
|----------------------|-----|--------------------------------------------------------------------------------------------------------------------------------------------------------------------------------------------------------------------------------------------------------------------------------------------------------------------------------------------------------------------------------------------------------------------|
| Study setting        | 9   | Description of study settings (eg, community clinic, academic hospital) and list of countries where data will be collected. Reference to where list of study sites can be obtained <input checked="" type="checkbox"/>                                                                                                                                                                                             |
| Eligibility criteria | 10  | Inclusion and exclusion criteria for participants. If applicable, eligibility criteria for study centres and individuals who will perform the interventions (eg, surgeons, psychotherapists) <input checked="" type="checkbox"/>                                                                                                                                                                                   |
| Interventions        | 11a | Interventions for each group with sufficient detail to allow replication, including how and when they will be administered <input checked="" type="checkbox"/>                                                                                                                                                                                                                                                     |
|                      | 11b | Criteria for discontinuing or modifying allocated interventions for a given trial participant (eg, drug dose change in response to harms, participant request, or improving/worsening disease) <input checked="" type="checkbox"/>                                                                                                                                                                                 |
|                      | 11c | Strategies to improve adherence to intervention protocols, and any procedures for monitoring adherence (eg, drug tablet return, laboratory tests) <input checked="" type="checkbox"/>                                                                                                                                                                                                                              |
|                      | 11d | Relevant concomitant care and interventions that are permitted or prohibited during the trial <input checked="" type="checkbox"/>                                                                                                                                                                                                                                                                                  |
| Outcomes             | 12  | Primary, secondary, and other outcomes, including the specific measurement variable (eg, systolic blood pressure), analysis metric (eg, change from baseline, final value, time to event), method of aggregation (eg, median, proportion), and time point for each outcome. Explanation of the clinical relevance of chosen efficacy and harm outcomes is strongly recommended <input checked="" type="checkbox"/> |
| Participant timeline | 13  | Time schedule of enrolment, interventions (including any run-ins and washouts), assessments, and visits for participants. A schematic diagram is highly recommended (see Figure) <input checked="" type="checkbox"/>                                                                                                                                                                                               |
| Sample size          | 14  | Estimated number of participants needed to achieve study objectives and how it was determined, including clinical and statistical assumptions supporting any sample size calculations <input checked="" type="checkbox"/>                                                                                                                                                                                          |
| Recruitment          | 15  | Strategies for achieving adequate participant enrolment to reach target sample size <input checked="" type="checkbox"/>                                                                                                                                                                                                                                                                                            |

**Methods: Assignment of interventions (for controlled trials)**

## Allocation:

|                     |     |                                                                                                                                                                                                                                                                                                                                                                                              |
|---------------------|-----|----------------------------------------------------------------------------------------------------------------------------------------------------------------------------------------------------------------------------------------------------------------------------------------------------------------------------------------------------------------------------------------------|
| Sequence generation | 16a | Method of generating the allocation sequence (eg, computer-generated random numbers), and list of any factors for stratification. To reduce predictability of a random sequence, details of any planned restriction (eg, blocking) should be provided in a separate document that is unavailable to those who enrol participants or assign interventions <input checked="" type="checkbox"/> |
|---------------------|-----|----------------------------------------------------------------------------------------------------------------------------------------------------------------------------------------------------------------------------------------------------------------------------------------------------------------------------------------------------------------------------------------------|

|    |                |     |                                                                                       |
|----|----------------|-----|---------------------------------------------------------------------------------------|
| 1  |                |     |                                                                                       |
| 2  | Allocation     | 16b | Mechanism of implementing the allocation sequence (eg, central                        |
| 3  | concealment    |     | telephone; sequentially numbered, opaque, sealed envelopes),                          |
| 4  | mechanism      |     | describing any steps to conceal the sequence until interventions are                  |
| 5  |                |     | assigned <input checked="" type="checkbox"/>                                          |
| 6  |                |     |                                                                                       |
| 7  | Implementation | 16c | Who will generate the allocation sequence, who will enrol participants,               |
| 8  |                |     | and who will assign participants to interventions <input checked="" type="checkbox"/> |
| 9  |                |     |                                                                                       |
| 10 | Blinding       | 17a | Who will be blinded after assignment to interventions (eg, trial                      |
| 11 | (masking)      |     | participants, care providers, outcome assessors, data analysts), and                  |
| 12 |                |     | how <input checked="" type="checkbox"/>                                               |
| 13 |                |     |                                                                                       |
| 14 |                | 17b | If blinded, circumstances under which unblinding is permissible, and                  |
| 15 |                |     | procedure for revealing a participant's allocated intervention during                 |
| 16 |                |     | the trial <input checked="" type="checkbox"/>                                         |
| 17 |                |     |                                                                                       |
| 18 |                |     |                                                                                       |
| 19 |                |     |                                                                                       |

### Methods: Data collection, management, and analysis

|    |                 |     |                                                                                                |
|----|-----------------|-----|------------------------------------------------------------------------------------------------|
| 20 |                 |     |                                                                                                |
| 21 | Data collection | 18a | Plans for assessment and collection of outcome, baseline, and other                            |
| 22 | methods         |     | trial data, including any related processes to promote data quality (eg,                       |
| 23 |                 |     | duplicate measurements, training of assessors) and a description of                            |
| 24 |                 |     | study instruments (eg, questionnaires, laboratory tests) along with                            |
| 25 |                 |     | their reliability and validity, if known. Reference to where data                              |
| 26 |                 |     | collection forms can be found, if not in the protocol <input checked="" type="checkbox"/>      |
| 27 |                 |     |                                                                                                |
| 28 |                 | 18b | Plans to promote participant retention and complete follow-up,                                 |
| 29 |                 |     | including list of any outcome data to be collected for participants who                        |
| 30 |                 |     | discontinue or deviate from intervention protocols <input checked="" type="checkbox"/>         |
| 31 |                 |     |                                                                                                |
| 32 | Data            | 19  | Plans for data entry, coding, security, and storage, including any                             |
| 33 | management      |     | related processes to promote data quality (eg, double data entry;                              |
| 34 |                 |     | range checks for data values). Reference to where details of data                              |
| 35 |                 |     | management procedures can be found, if not in the protocol <input checked="" type="checkbox"/> |
| 36 |                 |     |                                                                                                |
| 37 | Statistical     | 20a | Statistical methods for analysing primary and secondary outcomes.                              |
| 38 | methods         |     | Reference to where other details of the statistical analysis plan can be                       |
| 39 |                 |     | found, if not in the protocol <input checked="" type="checkbox"/>                              |
| 40 |                 |     |                                                                                                |
| 41 |                 | 20b | Methods for any additional analyses (eg, subgroup and adjusted                                 |
| 42 |                 |     | analyses) <input checked="" type="checkbox"/>                                                  |
| 43 |                 |     |                                                                                                |
| 44 |                 | 20c | Definition of analysis population relating to protocol non-adherence                           |
| 45 |                 |     | (eg, as randomised analysis), and any statistical methods to handle                            |
| 46 |                 |     | missing data (eg, multiple imputation) <input checked="" type="checkbox"/>                     |
| 47 |                 |     |                                                                                                |
| 48 |                 |     |                                                                                                |
| 49 |                 |     |                                                                                                |
| 50 |                 |     |                                                                                                |
| 51 |                 |     |                                                                                                |

### Methods: Monitoring

|    |                 |     |                                                                                              |
|----|-----------------|-----|----------------------------------------------------------------------------------------------|
| 52 |                 |     |                                                                                              |
| 53 | Data monitoring | 21a | Composition of data monitoring committee (DMC); summary of its role                          |
| 54 |                 |     | and reporting structure; statement of whether it is independent from                         |
| 55 |                 |     | the sponsor and competing interests; and reference to where further                          |
| 56 |                 |     | details about its charter can be found, if not in the protocol.                              |
| 57 |                 |     | Alternatively, an explanation of why a DMC is not needed <input checked="" type="checkbox"/> |
| 58 |                 |     |                                                                                              |
| 59 |                 |     |                                                                                              |
| 60 |                 |     |                                                                                              |

|    |          |     |                                                                                                                                                                                                                       |
|----|----------|-----|-----------------------------------------------------------------------------------------------------------------------------------------------------------------------------------------------------------------------|
| 1  |          | 21b | Description of any interim analyses and stopping guidelines, including who will have access to these interim results and make the final decision to terminate the trial <input checked="" type="checkbox"/>           |
| 2  |          |     |                                                                                                                                                                                                                       |
| 3  |          |     |                                                                                                                                                                                                                       |
| 4  |          |     |                                                                                                                                                                                                                       |
| 5  |          |     |                                                                                                                                                                                                                       |
| 6  | Harms    | 22  | Plans for collecting, assessing, reporting, and managing solicited and spontaneously reported adverse events and other unintended effects of trial interventions or trial conduct <input checked="" type="checkbox"/> |
| 7  |          |     |                                                                                                                                                                                                                       |
| 8  |          |     |                                                                                                                                                                                                                       |
| 9  |          |     |                                                                                                                                                                                                                       |
| 10 |          |     |                                                                                                                                                                                                                       |
| 11 | Auditing | 23  | Frequency and procedures for auditing trial conduct, if any, and whether the process will be independent from investigators and the sponsor <input checked="" type="checkbox"/>                                       |
| 12 |          |     |                                                                                                                                                                                                                       |
| 13 |          |     |                                                                                                                                                                                                                       |
| 14 |          |     |                                                                                                                                                                                                                       |

### Ethics and dissemination

|    |                               |     |                                                                                                                                                                                                                                                                                                                         |
|----|-------------------------------|-----|-------------------------------------------------------------------------------------------------------------------------------------------------------------------------------------------------------------------------------------------------------------------------------------------------------------------------|
| 15 |                               |     |                                                                                                                                                                                                                                                                                                                         |
| 16 |                               |     |                                                                                                                                                                                                                                                                                                                         |
| 17 | Research ethics approval      | 24  | Plans for seeking research ethics committee/institutional review board (REC/IRB) approval <input checked="" type="checkbox"/>                                                                                                                                                                                           |
| 18 |                               |     |                                                                                                                                                                                                                                                                                                                         |
| 19 |                               |     |                                                                                                                                                                                                                                                                                                                         |
| 20 |                               |     |                                                                                                                                                                                                                                                                                                                         |
| 21 | Protocol amendments           | 25  | Plans for communicating important protocol modifications (eg, changes to eligibility criteria, outcomes, analyses) to relevant parties (eg, investigators, REC/IRBs, trial participants, trial registries, journals, regulators) <input checked="" type="checkbox"/>                                                    |
| 22 |                               |     |                                                                                                                                                                                                                                                                                                                         |
| 23 |                               |     |                                                                                                                                                                                                                                                                                                                         |
| 24 |                               |     |                                                                                                                                                                                                                                                                                                                         |
| 25 |                               |     |                                                                                                                                                                                                                                                                                                                         |
| 26 | Consent or assent             | 26a | Who will obtain informed consent or assent from potential trial participants or authorised surrogates, and how (see Item 32) <input checked="" type="checkbox"/>                                                                                                                                                        |
| 27 |                               |     |                                                                                                                                                                                                                                                                                                                         |
| 28 |                               |     |                                                                                                                                                                                                                                                                                                                         |
| 29 |                               |     |                                                                                                                                                                                                                                                                                                                         |
| 30 |                               | 26b | Additional consent provisions for collection and use of participant data and biological specimens in ancillary studies, if applicable <input checked="" type="checkbox"/>                                                                                                                                               |
| 31 |                               |     |                                                                                                                                                                                                                                                                                                                         |
| 32 |                               |     |                                                                                                                                                                                                                                                                                                                         |
| 33 | Confidentiality               | 27  | How personal information about potential and enrolled participants will be collected, shared, and maintained in order to protect confidentiality before, during, and after the trial <input checked="" type="checkbox"/>                                                                                                |
| 34 |                               |     |                                                                                                                                                                                                                                                                                                                         |
| 35 |                               |     |                                                                                                                                                                                                                                                                                                                         |
| 36 |                               |     |                                                                                                                                                                                                                                                                                                                         |
| 37 | Declaration of interests      | 28  | Financial and other competing interests for principal investigators for the overall trial and each study site <input checked="" type="checkbox"/>                                                                                                                                                                       |
| 38 |                               |     |                                                                                                                                                                                                                                                                                                                         |
| 39 |                               |     |                                                                                                                                                                                                                                                                                                                         |
| 40 |                               |     |                                                                                                                                                                                                                                                                                                                         |
| 41 | Access to data                | 29  | Statement of who will have access to the final trial dataset, and disclosure of contractual agreements that limit such access for investigators <input checked="" type="checkbox"/>                                                                                                                                     |
| 42 |                               |     |                                                                                                                                                                                                                                                                                                                         |
| 43 |                               |     |                                                                                                                                                                                                                                                                                                                         |
| 44 |                               |     |                                                                                                                                                                                                                                                                                                                         |
| 45 | Ancillary and post-trial care | 30  | Provisions, if any, for ancillary and post-trial care, and for compensation to those who suffer harm from trial participation <input checked="" type="checkbox"/>                                                                                                                                                       |
| 46 |                               |     |                                                                                                                                                                                                                                                                                                                         |
| 47 |                               |     |                                                                                                                                                                                                                                                                                                                         |
| 48 | Dissemination policy          | 31a | Plans for investigators and sponsor to communicate trial results to participants, healthcare professionals, the public, and other relevant groups (eg, via publication, reporting in results databases, or other data sharing arrangements), including any publication restrictions <input checked="" type="checkbox"/> |
| 49 |                               |     |                                                                                                                                                                                                                                                                                                                         |
| 50 |                               |     |                                                                                                                                                                                                                                                                                                                         |
| 51 |                               |     |                                                                                                                                                                                                                                                                                                                         |
| 52 |                               |     |                                                                                                                                                                                                                                                                                                                         |
| 53 |                               |     |                                                                                                                                                                                                                                                                                                                         |
| 54 |                               | 31b | Authorship eligibility guidelines and any intended use of professional writers <input checked="" type="checkbox"/>                                                                                                                                                                                                      |
| 55 |                               |     |                                                                                                                                                                                                                                                                                                                         |
| 56 |                               |     |                                                                                                                                                                                                                                                                                                                         |
| 57 |                               | 31c | Plans, if any, for granting public access to the full protocol, participant-level dataset, and statistical code <input checked="" type="checkbox"/>                                                                                                                                                                     |
| 58 |                               |     |                                                                                                                                                                                                                                                                                                                         |
| 59 |                               |     |                                                                                                                                                                                                                                                                                                                         |
| 60 |                               |     |                                                                                                                                                                                                                                                                                                                         |

**Appendices**

|                            |    |                                                                                                                                                                                                |
|----------------------------|----|------------------------------------------------------------------------------------------------------------------------------------------------------------------------------------------------|
| Informed consent materials | 32 | Model consent form and other related documentation given to participants and authorised surrogates                                                                                             |
| Biological specimens       | 33 | Plans for collection, laboratory evaluation, and storage of biological specimens for genetic or molecular analysis in the current trial and for future use in ancillary studies, if applicable |

---

\*It is strongly recommended that this checklist be read in conjunction with the SPIRIT 2013 Explanation & Elaboration for important clarification on the items. Amendments to the protocol should be tracked and dated. The SPIRIT checklist is copyrighted by the SPIRIT Group under the Creative Commons "[Attribution-NonCommercial-NoDerivs 3.0 Unported](#)" license.

For peer review only
